# Supplementary material for: ‘Just because I’m old it doesn’t mean I have to be fat’: a qualitative study exploring older adults’ views and experiences of weight management
Source: PubMed Central journal article supplement (PMC6377572; doi:10.1136/bmjopen-2018-025680), 2019-02-05
Supplement: bmjopen-2018-025680.draft_revisions.pdf [file bmjopen-2018-025680.draft_revisions.pdf]

# BMJ Open

BMJ Open is committed to open peer review. As part of this commitment we make the peer review history of every article we publish publicly available.

When an article is published we post the peer reviewers' comments and the authors' responses online. We also post the versions of the paper that were used during peer review. These are the versions that the peer review comments apply to.

The versions of the paper that follow are the versions that were submitted during the peer review process. They are not the versions of record or the final published versions. They should not be cited or distributed as the published version of this manuscript.

BMJ Open is an open access journal and the full, final, typeset and author-corrected version of record of the manuscript is available on our site with no access controls, subscription charges or pay-per-view fees (<http://bmjopen.bmj.com>).

If you have any questions on BMJ Open's open peer review process please email [info.bmjopen@bmj.com](mailto:info.bmjopen@bmj.com)

# BMJ Open

## **'Just because I'm old it doesn't mean I have to be fat': A qualitative study exploring older adults' views and experiences of weight management**

|                               |                                                                                                                                                                                                                                                                                                 |
|-------------------------------|-------------------------------------------------------------------------------------------------------------------------------------------------------------------------------------------------------------------------------------------------------------------------------------------------|
| Journal:                      | <i>BMJ Open</i>                                                                                                                                                                                                                                                                                 |
| Manuscript ID                 | bmjopen-2018-025680                                                                                                                                                                                                                                                                             |
| Article Type:                 | Research                                                                                                                                                                                                                                                                                        |
| Date Submitted by the Author: | 26-Jul-2018                                                                                                                                                                                                                                                                                     |
| Complete List of Authors:     | Jackson, Sarah ; University College London, Epidemiology and Public Health;<br>Holter, Linn; University College London, Behavioural Science and Health<br>Beeken, Rebecca; University College London, Behavioural Science and Health;<br>University of Leeds Leeds Institute of Health Sciences |
| Keywords:                     | GERIATRIC MEDICINE, NUTRITION & DIETETICS, PRIMARY CARE, PREVENTIVE MEDICINE, PUBLIC HEALTH, QUALITATIVE RESEARCH                                                                                                                                                                               |
|                               |                                                                                                                                                                                                                                                                                                 |

SCHOLARONE™  
Manuscripts

View Only

1  
2  
3  
4  
5 **'Just because I'm old it doesn't mean I have to be fat': A qualitative study**  
6 **exploring older adults' views and experiences of weight management**  
7  
8  
9

10  
11 **Sarah E. Jackson<sup>1</sup>, Linn Holter<sup>1</sup>, Rebecca J. Beeken<sup>1,2</sup>**  
12

13  
14  
15  
16 <sup>1</sup>Department of Behavioural Science and Health, University College London, London, UK  
17

18 <sup>2</sup>Leeds Institute of Health Sciences, University of Leeds, Leeds, UK  
19  
20

21  
22  
23 **Key words:** older adults; elderly; weight loss; weight management; qualitative  
24  
25

26  
27 **Corresponding author**  
28

29 Sarah E Jackson, PhD. Department of Behavioural Science and Health, University College London, 1-19  
30

31 Torrington Place, London WC1E 6BT. Tel: (44) 207 679 5616. [s.e.jackson@ucl.ac.uk](mailto:s.e.jackson@ucl.ac.uk)  
32  
33  
34  
35  
36  
37  
38  
39  
40  
41  
42  
43  
44  
45  
46  
47  
48  
49  
50  
51  
52  
53  
54  
55  
56  
57  
58  
59  
60

## Abstract

**Objectives:** The aim of this study was to explore older adults' beliefs about the appropriateness of weight management, and how their experiences and expectations of weight management have changed as they have got older.

**Design:** Qualitative semi-structured interview study.

**Setting:** United Kingdom.

**Participants:** Older adults ( $\geq 65$  years) in the United Kingdom who had recent ( $< 5$  years) experience of trying to manage their weight ( $n=15$ ; 12 women, 3 men; 73% White British).

**Results:** Data were analysed using thematic analysis. Emergent themes highlighted that weight remained a concern for older adults, although having a high body weight was seen to be more acceptable at older than younger ages. Excess weight was reported to have negative consequences for health and wellbeing which participants felt could be alleviated by losing weight. Participants were motivated to lose weight for appearance and health reasons, but mentioned finding it harder to lose weight as they had got older and generally felt they had received limited guidance on weight management from health professionals.

**Conclusions:** The views of our participants highlight the need for further research into safe and effective methods of weight loss for older people and indicate that advice and support from health professionals would be welcomed.

## Strengths and limitations of this study

- This study offers insight into older adults' experiences of and attitudes towards weight management.
- The sample size was small but comparable with other qualitative studies.
- Self-selection bias may explain the generally positive attitudes towards weight management.
- Our findings do not reflect the views of non-white ethnic groups in which attitudes towards weight and ageing may differ.
- These results provide some encouragement for health professionals unsure about discussing weight management with older patients; indicating advice is likely to be well received.

## Introduction

The last three decades have seen a substantial rise in the number of older people affected by overweight and obesity, as a result of increases both in the total number of older adults [1,2] and the proportion who are carrying excess weight [3,4]. Repeat cross-sectional data from the National Health and Nutrition Examination Survey (NHANES) in the US and the Health Survey for England indicate that although obesity is becoming increasingly prevalent across all age groups, there is a trend for greater rises among older ( $\geq 55$  years) than among younger adults, with levels reaching 40% (vs. 35%) in the US [5] and 32% (vs. 23%) in England in 2010 [4]. Based on recent trends, and allowing for the ageing populations in each country, a striking simulation study projected that there would be a further 65 million obese adults in the US by the year 2030, of whom 24 million would be aged  $\geq 60$  years, and an additional 11 million in the UK, of whom 3.3 million would be aged  $\geq 60$  years [6]. However even without further rises in obesity prevalence, the number of older adults affected by obesity looks set to grow as the population continues to age [7].

For the older population, carrying excess weight comes with additional health risks. A substantial number of the medical complications associated with overweight and obesity become increasingly prevalent with age [8]. Around 80% of older people have at least one chronic health problem, and 50% have two or more [9]. Obesity also exacerbates the age-related decline in physical function: among older men and women, high body weight and excess body fat mass are related to increased physical dysfunction and disability [10] and strongly predict decline in functional status and future disability [11–13]. If past trends in obesity prevalence continue, the annual costs of obesity-related diseases are projected to rise by 13–16% in the US by 2030, of which 4% will be attributable to population ageing alone, and by 24–25% in the UK, of which 10% will be attributable to ageing alone [6]. An increase of this nature in the UK is a real threat to the future affordability of the NHS [14].

Given the considerable burden of obesity among older people, one might expect weight management for older people to be an urgent public health priority. However, there has been relatively little research into how best to promote and achieve healthy weight loss among older adults, and whether weight loss is even indicated for those at older ages is a controversial issue that has attracted considerable attention. Although studies have demonstrated that older people (aged  $\geq 65$  years) can achieve significant weight loss [15–19], losses of lean body mass and bone mineral density frequently accompany reductions in fat mass [15–20]. In addition, there is some evidence that the morbidity and mortality risk associated with excess weight decreases with advancing age [21–23]. As a result, there is uncertainty as to whether the benefits of losing

1  
2  
3 weight outweigh the risks, and medical professionals are often reluctant to advise that older patients  
4 affected by obesity should lose weight [24,25]. However, studies that report associations between weight  
5 loss and mortality among older adults with obesity often fail to take into account intentionality of weight  
6 loss [26–28]. Intentional weight loss does not appear to be associated with increased risk of mortality  
7 [26,29,30]. Furthermore, a review on weight loss in adults with obesity aged  $\geq 65$  years found evidence that  
8 in spite of losses of fat-free mass and bone density, lifestyle interventions lead to positive changes in body  
9 composition, physical function, and metabolic and cardiovascular risk [31]. Another review of the  
10 effectiveness of weight loss interventions for older adults with obesity concluded that despite the  
11 controversy, weight loss appears advisable, and the authors encouraged healthcare providers to target  
12 older adults with obesity who could benefit from participating in weight loss interventions [32].  
13  
14  
15  
16  
17  
18  
19  
20

21 Perhaps unsurprisingly in light of the limited evidence base on weight loss in the older population, little is  
22 known about older adults' own attitudes towards weight management. Studies comparing body image  
23 concerns of older and younger women suggest that body weight, and appearance in general, remain  
24 important as people get older [33–37]. In fact, as people get older and put on weight, their actual body  
25 image becomes increasingly discordant with their ideal body image and body dissatisfaction may even  
26 increase [38]. In addition, health concerns may become more salient with age, motivating older people to  
27 take action to tackle their weight [39]. Survey data indicate that losing weight is something that many older  
28 adults want, and are trying, to do. In a population-representative survey of British adults, older participants  
29 ( $\geq 55$  years) were equally as likely as their younger counterparts to report a desire to weigh less, although  
30 they were only about half as likely to currently be attempting to lose weight [40]. The reasons for these  
31 seemingly discrepant findings have yet to be established.  
32  
33  
34  
35  
36  
37  
38  
39

40 A clear understanding of older adults' attitudes towards weight management, including beliefs about the  
41 appropriateness of weight management at older ages, is needed. Moreover, in-depth insight into older  
42 people's experiences of trying to manage their weight and expectations relating to weight management  
43 attempts, and how these change with age, is required. Understanding these concepts may aid in the  
44 development of successful interventions to promote weight control in this population. The present study  
45 therefore aimed to explore older adults' attitudes towards and experiences and expectations of weight  
46 management. A qualitative design was chosen because we were not seeking to test a hypothesis, but rather  
47 to obtain a rich source of information to better understand the rationale behind attitudes towards weight  
48 loss, and experiences and expectations of weight management at older ages [41].  
49  
50  
51  
52  
53  
54  
55  
56  
57  
58  
59  
60

## Method

### Participants and recruitment

Our inclusion criteria were older adults (age  $\geq 65$  years) living in the United Kingdom, who had recent (<5 years) experience of weight management. We excluded individuals who had any cognitive impairment that might prohibit their ability to recall their weight management experience or to give informed consent (e.g. dementia). We chose to use interviews rather than focus groups as we were interested in learning about people's individual beliefs and experiences, rather than determining a group consensus. We did not want group discussions or concerns that others might view their beliefs to be "incorrect" to influence individuals' accounts of their own unique experiences.

The study was advertised via posters and flyers displayed in and around University College London and at charities and local community centres that hold targeted activities for older adults. Interested and eligible participants were given an information sheet and the opportunity to ask questions. We offered the option of conducting the interview face-to-face (at the university) or over the telephone to encourage individuals to take part who might have otherwise been put off by a lack of flexibility around time (e.g. because of work or personal commitments) or location (e.g. because of distance or ability to travel), or difficulties in hearing accurately on the telephone. A consent form and brief socio-demographic questionnaire were mailed for completion before the interview took place. We aimed to recruit until it was felt that saturation had been reached. Based on previous qualitative studies in similar groups, we expected that around 15 participants would be required to achieve this [42,43]. All interviews were conducted with only the participant and interviewer present. Ethical approval was granted by the University College London Research Ethics Committee, reference 5234/001.

### Data collection

Socio-demographic questions covered age, sex and ethnic group. The pre-interview questionnaire also asked participants to report their height and weight, which were used to calculate their body mass index (BMI; weight in kg divided by the square of height in metres). Participants who attended the interview in person were offered use of scales at the university to complete or verify their self-reported data, but this was not a requirement for participation.

1  
2  
3 Semi-structured interviews were carried out by a female researcher (LH; BSc Psychology), an MSc Health  
4 Psychology student who had completed qualitative training as part of her BSc and MSc. The interviewer had  
5 no previous relationship with the study participants. Participants were aware that the study was part of the  
6 interviewer's research degree. Interviews lasted approximately one hour, and were recorded and  
7 transcribed verbatim. A topic guide (**Table 1**) was developed collaboratively by all authors to guide the  
8 interviews and comprised a series of open questions covering experiences of weight management and  
9 motivators and barriers for weight loss, with a focus on any changes that have occurred with ageing, as well  
10 as views on the appropriateness of weight management for older people. The interviewer was trained to  
11 have minimal verbal input and prompt only when appropriate [44].  
12  
13  
14  
15  
16  
17  
18

### 19 **Patient and Public Involvement**

20  
21  
22 Patients were not involved in the development of the research questions or choice of study design. The  
23 topic guide was piloted with two lay individuals for acceptability and comprehension, and to provide an  
24 indication of the time required to participate. Members of the public supported recruitment to the study  
25 through permitting study advertisements to be placed within local community centres that hold targeted  
26 activities for older adults.  
27  
28  
29  
30

31 [Table 1 about here]  
32  
33

### 34 **Analysis**

35  
36  
37 Data were analysed using thematic analysis, a qualitative method for identifying, analysing and reporting  
38 themes [45]. This method was chosen with the aim of providing a rich description of the data, and to  
39 identify themes at an explicit level using a realist approach [45]. As data were acquired, SEJ read the  
40 transcripts for essential familiarisation and to generate initial codes. These were amended and refined  
41 through discussion between the researchers in an iterative process until a final coding list was agreed. SEJ  
42 coded all the transcripts according to the established coding structure in NVivo V.10 and a random selection  
43 of transcripts (n=2) were coded by a second researcher (RJB) to check for reliability. Inter-rater reliability for  
44 the coding was generally high (81-100% agreement; mean 98%) with any minor differences resolved by  
45 discussion. SEJ and RJB collated codes into common themes, which were reviewed and refined, named and  
46 each given a written description. All themes were checked against the transcripts to ensure that they  
47 reflected the majority of participants. Individual experiences were also highlighted. The completed  
48  
49  
50  
51  
52  
53  
54  
55  
56  
57  
58  
59  
60

consolidated criteria for reporting qualitative research checklist is available in online supplementary material 1 [46].

## Results

### Participants

Fifteen interviews were conducted with 12 women and 3 men, aged between 60 and 84 years (**Table 2**); 11 face-to-face at the university and 4 by telephone. After the target number of 15 interviews was completed, the authors discussed the themes emerging and agreed that saturation had been reached [47]. Participants were on average 71.1 years old and the majority (73%) described their ethnicity as White British. While all reported having tried to manage their weight in the last five years, at the time of interview 33% had a BMI in the obese range ( $\geq 30$  kg/m<sup>2</sup>), a further 53% were overweight (BMI 25-29.9 kg/m<sup>2</sup>), and the remaining 13% had a BMI at the upper end of the normal weight range (18.5-24.9 kg/m<sup>2</sup>).

[Table 2 about here]

### Themes

Six themes emerged from the data: (1) weight remains a concern at older ages, (2) excess weight is more acceptable at older than younger ages, (3) excess weight has a negative impact on health and wellbeing, (4) appearance and health are important motivators for weight loss, (5) losing weight gets harder as you get older, and (6) limited guidance on weight management from health professionals. On the whole, there were no notable differences in responses by age, sex or weight status, so results are presented for the whole sample.

#### ***Weight remains a concern at older ages***

Participants spoke about the current importance of weight to them relative to when they were younger. Most participants felt weight control was just as important at older ages: "Just because I'm old [it] doesn't mean that I have to be fat ... It's very important to me, weight. It hasn't lost any importance at all" (106, female, 71 years, BMI 24.2) and "Once you know you're overweight and you feel a certain way you never lose sight of that" (110, female, 71 years, BMI 40.4) and "I don't think you ever get rid of that psychological

1  
2  
3 fear of fat, or at least I don't know anyone who suddenly said it doesn't matter" (113, female, 71 years, BMI  
4 35.7).  
5  
6

7 For some participants, the issue of weight control had become more relevant with age. A few people spoke  
8 about how they had gained weight gradually over the life course: "When I look at my life, in terms of weight  
9 I was probably nine and a half stone until I was in my thirties and had my children. Then it went up to  
10 probably ten stone. And then in my fifties bordering on eleven stone. And then in my sixties eleven and a  
11 half stone" (102, female, 68 years, BMI 27.0) and "As years progress, you put two pounds on there, a pound  
12 here, another stone, another stone. And I'm the biggest I've been now" (103, female, 69 years, BMI 26.1).  
13 Some reported having gained weight as they got older due to changes in lifestyle: "I used to do a lot of  
14 exercise. As I got older, I stopped doing so much so I got fatter" (105, male, 72 years, BMI 28.9). Others  
15 attributed age-related weight gain to specific health problems or medication use: "For most of my life I've  
16 been a reasonable weight. ... I had hip problems when I reached about 60 and had to have a hip  
17 replacement, and I put on a lot of weight before [the operation] because obviously I could not move as fast"  
18 (101, female, 67 years, BMI 28.2) and "I've always been aware of what I eat but it doesn't seem to matter; I  
19 keep gaining and gaining and then having to really hold it back. And I think also now, that I am on  
20 medication – that that has a role to play in it as well" (110, female, 71 years, BMI 40.4).  
21  
22  
23  
24  
25  
26  
27  
28  
29  
30  
31

32 However, several participants reported feeling less motivated to lose weight now that they were older: "I  
33 think when you're young, the motivation is there. You want to get the latest fashion, and you want to look  
34 stunning. And you want to find a mate. When you're older you get your old mate and the motivation is  
35 gone" (102, female, 68 years, BMI 27.0). A couple questioned whether trying to lose weight at older ages  
36 was worth the effort: "It can be done it's just you get quite lazy as you grow older. You think, 'Oh, is it worth  
37 it?'" (103, female, 69 years, BMI 26.1) and "Sometimes you think, 'Oh well, what is the point?'" (115,  
38 female, 60 years, BMI 33.9) and "My sister, she struggles with weight although she is quite slim ... and on  
39 the phone this morning she said, 'Since my party I haven't been able to lose weight, I'm putting it on again'.  
40 And then she said, 'But at our age really, do we care at 80 and 71?' And when I think of it like that, I think,  
41 'Well do I? Do I really care?' And then the next part of me says, 'Yes, you do'" (106, female, 71 years, BMI  
42 24.2).  
43  
44  
45  
46  
47  
48  
49  
50

51 Participants generally felt that people shouldn't be concerned about age when it comes to losing weight: "I  
52 don't think you should start thinking like that, because as soon as you start thinking 'I can't do this because  
53 I'm...' whatever, you start limiting yourself. And why should you? ... So you take no notice when people sort  
54  
55  
56  
57  
58  
59  
60

1  
2  
3 of, when my children say 'You can't do that!' because I can!" (101, female, age 67, BMI 28.2). However,  
4 many mentioned taking a more laid back approach to weight loss: "The older I got the, the more sensible I  
5 got I think. So I could do with being a stone lighter but, you know, I'm not desperate about it" (113, female,  
6 71 years, BMI 35.7) and "You have to recognise your limitations as you get older. I'm not doing too badly  
7 really" (111, male, 84 years, BMI 27.0). Participants also reported setting less ambitious weight loss goals:  
8 "As far as I'm concerned, the best is that I have a moderate amount of weight loss that suits me until I get to  
9 a point where I think I look ok, and then I'll stop and I don't go much further" (101, female, age 67, BMI  
10 28.2) and "You've always got to look nice, but certainly when you're my age, over 70, I don't think you  
11 should try to be slim. I don't think it's healthy" (107, female, 78 years, BMI 28.0).

### 19 ***Excess weight is more acceptable at older than younger ages***

21 Although participants generally considered weight to be an important issue, many reported feeling less  
22 pressure to lose weight compared with when they were younger: "There's no pressure at this point; I don't  
23 really feel I'm pressured to hurry up and get rid of another stone. I think I will eventually" (113, female, 71  
24 years, BMI 35.7) and "I think if you're older you [lose weight] for yourself, you don't do it to satisfy people  
25 around you, to be liked more. You just do it because you want to lose weight. ... You do it because you feel  
26 you should do it, and for your own benefit, that's all" (103, female, 69 years, BMI 26.1) and "You've got to  
27 do it yourself because it is something that you want; it's for you and you're not doing it for anybody else"  
28 (109, female, 72 years, BMI 26.4).

30 Several people talked about how their family and friends had tried to discourage them from worrying about  
31 their weight and raised concerns about weight loss: "My daughter, who is wonderful in every and each way,  
32 says, 'Mum, just buy it, enjoy wearing it, you would look lovely – don't worry about your weight!'" (102,  
33 female, 68 years, BMI 27.0), "I have thinner friends who say, 'Just forget about it, you're alright', and I say, 'I  
34 can't!'" (110, female, 71 years, BMI 40.4) and "If you lose weight then they say, 'You don't look too good',  
35 'He's looking very pale', and all of that" (105, male, 72 years, BMI 28.9).

36 Participants spoke about there being less stigma around overweight at older ages: "I think a lot of people  
37 joke about it and say, 'Oh, it's middle age spread,' so they accept having more weight. I think there is less  
38 stigma than at a younger age" (110, female, 71 years, BMI 40.4) and "[There's] much less [stigma] because  
39 we become invisible. Nobody notices older people, or we all look alike or something. I mean I'm not exactly  
40 small and I've been walked into by people who just didn't see me. You become invisible, so nobody's going  
41 'urgh'; you're just another old person with white hair and that's that" (113, female, 71 years, BMI 35.7).

### ***Excess weight has a negative impact on health and wellbeing***

Participants talked about the physical health consequences of excess weight: “The extra weight affects my sleep, my breathing is more affected, my joints are more affected” (110, female, 71 years, BMI 40.4) and “I do get tired easily, and I think that’s probably because I’m carrying more weight” (111, male, 84 years, BMI 27.0). However, more so, the focus was on the impact of weight on mental wellbeing. Several people talked about feeling depressed about their weight: “It is pretty depressing looking at yourself in the mirror and thinking ‘Oh God, look at that!’ ... it’s mental as well as physical” (103, female, 69 years, BMI 26.1) and “I tried some things on this morning and I actually looked at myself and cried. I do get depressed with my weight; I don’t like it, and I berate myself quite a bit as well. ... I talk to myself going up and down the flat: ‘Oh you fat cow, for god’s sake have a bit of control!’” (106, female, 71 years, BMI 24.2). Some mentioned negative effects on self-esteem: “I try hard not to be negative about my body, but if I’m honest I am. I don’t feel as confident with it, it affects my self-esteem” (110, female, 71 years, BMI 40.4) and feelings of self-blame: “I get annoyed with myself because I know it’s my own fault that I’m putting on weight, that I’m not losing it” (105, male, 72 years, BMI 28.9).

Participants generally felt that losing weight would help to improve their health and wellbeing: “I don’t look huge... but oh, I’d love to be a size 14 again, and just be happy in my own skin” (102, female, 68 years, BMI 27.0). Those who had successfully lost weight reflected on how it had improved their physical functioning: “I feel stronger with my weight down” (112, female, 70 years, BMI 23.3) and “I’ve lost a lot and I do feel better about it. See I can get up now, I can bend down like I couldn’t before, too – I couldn’t even see my shoelaces. ... You just feel so much better because you can do things” (109, female, 72 years, BMI 26.4). Psychological benefits were also mentioned: “I think [losing weight] made me feel better about myself. It’s confidence, it’s a nice place to be. You think, ‘Alright, I don’t look too bad.’ ... [It] puts you in a nice frame of mind” (104, female, 74 years, BMI 28.0) and “I feel better, lighter – more, how can I explain? Full of life” (103, female, age 69, BMI 26.1).

While most participants endorsed benefits of losing weight, one talked about the importance of maintaining body weight in order to have reserves in the event of illness: “I firmly believe that there is nothing wrong with older people being a bit fat-ish ... to be honest I think do we not, as we get older, need to be a little more rounded?” (107, female, 78 years, BMI 28.0); but only to a certain point: “I think if you’re say 18 or 20 stone or something like that when you’re 60, it’s time to say get yourself a gastric band because it’s dangerous” (107, female, 78 years, BMI 28.0).

### ***Appearance and health are important motivators for weight loss***

Participants talked about appearance and health as the primary reasons for wanting to manage their weight. For many, appearance was a powerful motivator: “Vanity stays with you all your life if you’ve always been a bit attractive. I like to keep it that way ... obviously it’s gone, it’s going, but I don’t want to look a mess for my sake, for my children’s sake if they see me” (107, female, 78 years, BMI 28.0) and “I’d like to look good. I’d like to look how I think I look, and I think I look 6 foot 2, broad shoulders, narrow waist, hips and all of that. When I look in the mirror I know I don’t” (105, male, 72 years, BMI 28.9) and “I know it sounds stupid, but [health] takes second place to appearance. It shouldn’t do, but it does” (106, female, 71 years, BMI 24.2). However, not everyone was concerned about losing weight for appearance reasons: “I’m quite confident. I see other people wearing beautiful clothes and would love to get into them, but it doesn’t worry me that I can’t really. ... It’s sort of not a major issue for me” (102, female, age 68, BMI 27.0).

The majority of participants cited health as a key driver for weight loss and spoke about health concerns becoming increasingly important as they had got older: “I suppose it started in my fifties. I noticed that I could not control [my weight] very easily. And then in the last 6-7 years when I’ve been diagnosed with a lung problem” (110, female, 71 years, BMI 40.4) and “I think it’s more dangerous [to be overweight] when you’re older, because of stroke and heart attacks and things like that” (109, female, 72 years, BMI 26.4). For a few, appearance had taken a backseat to health as they had got older: “I don’t care so much [about appearance] now, it’s more the health side of it. When you get older, you don’t care a damn what people think of you; not like when you’re younger” (114, female, 70 years, BMI 36.5) and “Fat’s no longer a fashion issue, but it’s become more of a health issue” (113, female, 71 years, BMI 35.7).

Several participants spoke of specific health conditions that they felt could be improved by losing weight: “I was diagnosed with osteoporosis about 12-13 years ago and it was a complete shock. ... So that was quite hard. And so therefore I thought, I don’t need to put too much weight on here but I had to eat sensibly” (104, female, 74 years, BMI 28.0) and “I have breathing problems and so any extra weight makes breathing more difficult” (110, female, 71 years, BMI 40.4) and “I’ve got a dodgy heart and I’ve got terrible arthritis. I’ve got a bad back, I’ve got bad knees and everything else. And you know for years the doctors have been saying to me: lose weight, it will be better ... And before I lost three and a half stone I was borderline diabetic, so of course that was another factor that made me lose weight” (106, female, 71 years, BMI 24.2). One participant mentioned that weight loss could reduce the need to take medication to control weight-related health issues: “My blood pressure is borderline high and I know that if I get rid of that extra stone it

1  
2  
3 [will] probably come down into comfortable normal without any medication” (113, female, 71 years, BMI  
4 35.7). Another spoke of fear of adverse consequences of weight-related health conditions: “I gained a lot of  
5 weight up to two to three years ago. I was about 19 stone and I thought, ‘This can’t go on.’ And because I’m  
6 diabetic, I thought, ‘I’ve got to lose weight, I don’t want to have my legs chopped off. I don’t want to go  
7 blind. I’ve got to do something about this,’ and I’ve lost about two and a half, three stone” (114, female, 70  
8 years, BMI 36.5).  
9  
10  
11  
12

### 13 14 ***Losing weight gets harder as you get older*** 15

16  
17 Participants spoke unanimously about finding it more difficult to manage their weight as they got older: “It’s  
18 hard to lose weight when you get older, it’s much harder. You can lose seven pounds in a week years ago  
19 just like that, but once you get to a certain age it’s a lot harder” (114, female, 70 years, BMI 36.5) and  
20 “When you’re older it doesn’t come off quite as quickly” (113, female, 71 years, BMI 35.7) and “[It] appears  
21 to me, having looked at all my contemporaries, you do put on weight more easily [as you get older]. But  
22 what’s more interesting, which I didn’t expect to find – because no-one expects ageing to be interesting, but  
23 it actually is – is that you put on weight in different places” (101, female, age 67, BMI 28.2).  
24  
25  
26  
27  
28

29 Multi-dimensional barriers to managing weight effectively at older ages were reported:  
30  
31

#### 32 ***Health-related barriers*** 33

34  
35 The ageing process was reported to negatively influence ability to lose weight. A general ‘slowing down’  
36 with age was commonly mentioned: “I think it has to do with lifestyle, ‘cause obviously you slow down –  
37 you know, it would be very abnormal if you didn’t – and so I don’t move as quick. If I clean a room in the  
38 house it used to take me half an hour, now it takes me an hour and a half” (104, female, 74 years, BMI 28.0)  
39 and “See a young person could get up in the morning and run around or could do many more things. But  
40 when you’re old, you go home, you get tired” (109, female, 72 years, BMI 26.4).  
41  
42  
43  
44  
45

46 In addition to an impact on lifestyle, some participants speculated that this slowing down process might also  
47 have an effect on metabolism: “It may be something to do with our makeup as we get older and  
48 metabolism slows down I would imagine; everything else slows down” (104, female, 74 years, BMI 28.0) and  
49 “I don’t know whether your metabolism just doesn’t function as well as it did. So it’s probably just a factor  
50 of ageing and organs that nothing works as efficiently as it did 50 years ago” (113, female, 71 years, BMI  
51  
52  
53  
54  
55  
56  
57  
58  
59  
60

1  
2  
3 35.7) and “It’s just a way of... how you digest your food I expect. I don’t know” (103, female, age 69, BMI  
4 26.1).

5  
6  
7 Specific problems with health and mobility were also mentioned as barriers to weight loss at older ages:

8  
9 “For an older person it’s very hard for them to lose weight because they can’t get about like a young person  
10 anymore. And they do tend to put more weight on ... you’re not going to burn off the calories because you  
11 can’t get about” (109, female, 72 years, BMI 26.4) and “I’m not as mobile as I was. I started doing tai chi and  
12 pilates but it’s not really exercise as such; I can’t do that because of my hips. That’s [got] a lot to do with my  
13 weight – I mean, I do use it as an excuse as well – but it is not just an excuse” (106, female, 71 years, BMI  
14 24.2). Medication use was also thought to make it more difficult to lose weight: “Huge amounts of older  
15 people are very isolated, and they’re depressed and taking anti-depressants which are putting on the  
16 weight. It doesn’t help to take off weight, depression” (110, female, 71 years, BMI 40.4).  
17  
18  
19  
20  
21  
22

### 23 *Emotional barriers*

24  
25  
26 A commonly cited barrier to weight loss was a lack of willpower: “I’ve got the motivation, I just haven’t got  
27 the will. I think it’s my willpower” (105, male, 72 years, BMI 28.9) and “It is very difficult, staying motivated  
28 – the hardest thing” (110, female, 71 years, BMI 40.4). For some, an awareness of their own mortality and  
29 wanting to enjoy life made it hard to sustain their resolve to lose weight: “I’ve lost that steely determination  
30 that I did have at one stage, you know: ‘I’m going to do it’. ... Now I think, ‘Oh yes, I’m going to lose half a  
31 stone’ and then we’re invited to lunch and I think, ‘Oh, stop it!’, you know, friends of mine are dying so why  
32 should I give up [eating out]?” (102, female, age 68, BMI 27.0) and “I know it sounds depressing – I’m  
33 enjoying my life, I’m very happy at the moment – but there’s no future in being old. Let’s face it, you have to  
34 be realistic here, so you get to the stage where [you think], ‘Well, if I can’t enjoy going out for a drink at  
35 night, enjoying the food I like, what is there in life?’” (107, female, 78 years, BMI 28.0).  
36  
37  
38  
39  
40  
41  
42  
43

44 A few participants mentioned comfort eating and using food to deal with loneliness: “I don’t know whether  
45 there is a little bit of comfort eating coming in maybe. I need something when my son and his grandchildren  
46 and his family are abroad; it just makes me a bit sad. And I’m not as active as I was before and that probably  
47 makes me a bit sad. So I think there is an element of comfort eating” (102, female, age 68, BMI 27.0) and  
48 “Old age is very lonely, so you have lots of time. ... Generally I’ll only be out of my house three hours and  
49 that’s a lot for old people ... so you’ve got the rest of the 21 hours of the day left” (107, female, 78 years,  
50 BMI 28.0).  
51  
52  
53  
54  
55  
56  
57  
58  
59  
60

### *Situational barriers*

Other reported barriers to effective weight management predominantly related to retirement and the impact it had on free time, physical activity and disposable income. Some participants commented that retiring left them more time for food-focused social occasions: “Now I’m retired and at home, we have a very active life. I don’t mean active in exercise terms, but we’ve got lots of friends and our pleasure – I suppose one of the pleasures – is that you go out to nice places to eat and entertain, and everything is food-focused” (102, female, 68 years, BMI 27.0). Having more free time was also cited as an opportunity to be more active: “Loads of people I’m older with are extremely active; even more so than people in their sort of middle years when they have children and don’t have time to do things for themselves quite as much” (101, female, 67 years, BMI 28.2), but some commented that stopping work had made them more sedentary: “Because I am retired now I have more time to sit, which I have never had really; I worked all my life” (104, female, 74 years, BMI 28.0) and “I’m retired now so I’m not walking around all day. ... I have to think about being active” (110, female, 71 years, BMI 40.4). Some believed a decline in physical activity was a central factor in age-related weight gain: “I’ve had a weight problem all my life, but an awful lot of people who haven’t suddenly find they’ve started gaining weight in their 50s, and that’s essentially because of the inactivity. Men are really bad at this. Men go to work, then they retire, and then they sit. They probably don’t eat much more but they do a whole lot less” (113, female, 71 years, BMI 35.7). Free bus passes provided to the over-60s were mentioned in the context of discouraging physical activity: “The Freedom pass is another thing of concern, which I shouldn’t have because it tends to make me hop on a bus for a couple of stops instead of walking” (105, male, 72 years, BMI 28.9). Retirement also had an effect on disposable income available to fund weight loss efforts: “WeightWatchers is quite expensive; certainly when you’re on a pension I find it’s quite dear. When you’re at work you don’t think about it” (104, female, 74 years, BMI 28.0).

While most explanations for weight loss becoming more difficult over time related to the ageing process, some participants attributed increasing difficulty in managing their weight to changes in the food environment: “I think one of the big changes is [that now] you are bombarded with food. When I was growing up, you’d never think of going to get a takeaway. Where I live, on the high street, at every corner is something, it’s all fast food” (110, female, 71 years, BMI 40.4) and “I lived in a house where there wasn’t actually a huge amount of food at some points when I was small, so not having enough to eat was relatively common” (101, female, 67 years, BMI 28.2). However, some commented that information on healthy living was more readily available than when they were younger: “There was no information at all on what made

1  
2  
3 you fat; nobody said anything about it (110, female, 71 years, BMI 40.4) and “Everybody, absolutely  
4 everybody knows [what they should be eating]; I can’t believe that anybody on the planet who doesn’t  
5 know. The five a day message has certainly got around” (113, female, 71 years, BMI 35.7), and one  
6  
7 participant mentioned that better availability of and access to healthy foods had made it easier to lose  
8 weight: “I think it’s better now, because I’m eating better things. And when I was trying to lose weight  
9 before there wasn’t the variety of food available” (112, female, 70 years, BMI 23.3).

#### 14 *Weight loss strategies less effective than at younger ages*

16  
17 In addition to these barriers, several participants commented that strategies for weight loss that they had  
18 used successfully when they were younger did not produce the same results at older ages: “When you’re  
19 younger, the weight goes much quicker than when you’re older. ... If I went a week eating the way I ate last  
20 week I would have lost half a stone, no problem. I lost a pound. It’s much, much more difficult at this age to  
21 lose weight, it really is” (106, female, 71 years, BMI 24.2) and “I eat less than I used to and it doesn’t seem  
22 to make much difference. ... You know, [at younger ages] when you said you would lose weight and you cut  
23 down on something, it showed. But I don’t think it makes much difference when you grow older” (103,  
24 female, 69 years, BMI 26.1).

#### 31 *Limited guidance on weight management from health professionals*

33  
34 Participants discussed the role of health professionals in their weight management efforts, with mixed  
35 experience. Many felt it was important for health professionals to be involved with older people’s weight  
36 management efforts: “I think the doctor’s is the first stop for somebody if they’re very overweight. You have  
37 to tell them point blank: ‘You’re just too heavy and you’re going to suffer for it, you won’t live very long like  
38 this’. You have to be cruel to be kind” (107, female, 78 years, BMI 28.0) and thought older people concerned  
39 about their weight should “Talk to your GP, find out if you need to lose weight, if so do it properly – either  
40 through a GP or a dietitian” (109, female, 72 years, BMI 26.4).

46  
47 Some participants said their doctor had told them not to worry about being overweight: “My doctors years  
48 ago were saying to me, ‘You’re a little bit overweight, but it’s regular [stable]. That’s good; if you’re 11 stone  
49 and two years later you’re still at 11 stone that’s a good sign” (111, male, 84 years, BMI 27.0) and “When I  
50 went last time for my regular check up, [the GP] weighed me and said ‘Oh, you’re so many kilos, that’s ok’. I  
51 thought ‘you must be joking!’ If you sort of double that, multiply that by 2.2 or whatever it is [to convert  
52 into pounds], that’s a hell of a lot of weight! And she didn’t seem bothered” (105, male, 72 years, BMI 28.9).

1  
2  
3 A number of participants had received guidance and support for weight management from a health  
4 professional. Most found it useful: "The doctor asked me, did I want to go for prescription exercise. I agreed  
5 to that. ... When I was out of breath, he told me it had got a lot to do with my weight – and that I was  
6 smoking – but it was to do with weight. Once I went there and I got into the programme and [my weight]  
7 started to come down I was fine" (109, female, 72 years, BMI 26.4) and "I went privately to somebody –  
8 we've got a small insurance thing – and, he did these tests and I had an ulcer. And my weight had gone up a  
9 lot, it appeared, at the time. And he just politely said, 'It would help if you lost weight.' He was just a very  
10 nice man, very gentle. So I lost quite a bit, and I managed to get it down" (112, female, 70 years, BMI 23.3).  
11 However, some reported a less positive experience: "I did go to see an NHS health coach for weight, but I  
12 found it really useless. ... It was so basic, I got bored with it. Or they give you reams of information to read  
13 but it doesn't actually stay" (110, female, 71 years, BMI 40.4).  
14  
15  
16  
17  
18  
19  
20  
21  
22

23 Some participants mentioned a total lack of advice from health professionals: "I have to go to the doctor  
24 every six months, blood tests and everything. ... They don't get on [at] me and I wonder why, because I  
25 know I'm really overweight, but they don't seem to make a lot of comment. They just say 'Oh you should  
26 cut out the biscuits', they don't say, 'Do this, do that.' It really surprises me" (105, male, 72 years, BMI 28.9)  
27 and "When you see somebody professional they just don't do anything about it. They could be a bit more  
28 helpful I think" (112, female, 70 years, BMI 23.3). Others reported simply having been 'told off' about their  
29 weight: "I get told off by the doctor for putting on weight: 'I think it should be a bit less than that,' she will  
30 say. She doesn't like me putting on too much weight" (111, male, 84 years, BMI 27.0) and "I had a stomach  
31 ulcer, and you get acidity in the back of your throat. So I did talk it over with the senior GP and she said, 'Oh  
32 well, if you're overweight then you lose it or you put up with it.' That was it" (112, female, 70 years, BMI  
33 23.3).  
34  
35  
36  
37  
38  
39  
40  
41

42 A number of participants questioned how much doctors could actually do to help: "Old people go straight to  
43 the doctor which is a bit sad really, because what can the doctor do? He would probably give you a diet  
44 sheet. But as soon as I'm told what to eat, I don't want to eat it" (107, female, 78 years, BMI 28.0). Others  
45 felt that advice from a doctor was (or would be) a powerful motivator: "[The GP] said about going back to  
46 the gym and that has spurred me on" (114, female, 70 years, BMI 36.5) and "You know, if someone at the  
47 doctors' had said, 'Do that,' it would have been done." (105, male, 72 years, BMI 28.9). Some participants  
48 highlighted the lack of clear information on weight loss at older ages: "There is a lack of information; I  
49 haven't seen anything that is targeting older people. They just say 'Eat less and move more.' I think it's  
50 important to have information about what to eat, and to have some supportive groups targeting the over-  
51  
52  
53  
54  
55  
56  
57  
58  
59  
60

1  
2  
3 60s" (110, female, 71 years, BMI 40.4) and "I don't know who I'd ask. The doctor's not interested. I could  
4 see somebody privately but it costs, and are they going to be any better really?" (112, female, 70 years, BMI  
5 23.3).  
6  
7  
8  
9  
10

## 11 **Discussion**

12  
13  
14  
15 This results of this qualitative study indicate that weight remains an issue of significant concern to older  
16 people. Although participants felt it was more socially acceptable to have excess weight at older than  
17 younger ages, they reported substantial negative impacts on physical and psychological health associated  
18 with carrying excess weight that they felt could be alleviated by weight loss. Participants described how  
19 losing weight had become more difficult as they had got older, citing a range of barriers to effective weight  
20 management including age-related declines in health and mobility, emotional factors such as comfort eating  
21 and lack of willpower, changes in the food environment, and the impact of retirement on food intake and  
22 physical activity. While the majority indicated that they would appreciate support from a health  
23 professional in managing their weight, few reported having received useful advice in the past.  
24  
25  
26  
27  
28  
29  
30

31 This study has a number of limitations. The sample size was small but comparable with other qualitative  
32 studies [42,43], and we believe data were saturated as no new themes emerged from the last interviews.  
33 The generally positive attitudes towards weight management may be explained by self-selection bias. Those  
34 interested in our study may be those with a long-term interest in weight control, or those who have become  
35 interested as they have got older. In order to collect data on experiences as well as attitudes, we restricted  
36 our sample to people with recent experience of weight management. Excluding individuals who have not  
37 attempted to control their weight in the last five years may mean our results overlook the views of those  
38 who feel weight management is inappropriate at older ages. Future research should seek to explore this in  
39 more depth. All participants were white, so our findings do not reflect the views of other ethnic groups in  
40 which attitudes towards weight and ageing may differ. To be inclusive of individuals who were unable to  
41 travel to the university, this study used a combination of face-to-face and telephone interviews. However,  
42 mixing such methods can also be viewed as a limitation as telephone interviews tend to be shorter than  
43 those conducted in person, and typically see interviewees and interviewers speak for less and greater time  
44 respectively [48]. This may result in telephone data lacking the same breadth of coverage and depth of  
45 detail that can be achieved face-to-face.  
46  
47  
48  
49  
50  
51  
52  
53  
54  
55  
56  
57  
58  
59  
60

1  
2  
3 Our participants generally reported feeling less social pressure to lose weight than they had when they were  
4 younger. Previous research has shown that older women may be less influenced by, and feel less pressure  
5 to attain, the media's portrayal of cultural ideals for beauty and thinness [49,50], and tend to endorse a  
6 more curvaceous body shape ideal than their younger counterparts [51]. Some commented that they  
7 perceived obesity among older adults to be less stigmatised, consistent with surveys from the UK and USA  
8 showing an age-related decline in reports of weight-related discrimination [52,53]. While these observations  
9 might lead to the assumption that older adults are less concerned about managing their weight than  
10 younger people, this did not appear to be true for our participants. Appearance remained a leading  
11 motivator for weight loss for many participants, and an important consideration for others who cited health  
12 as their primary concern. This is concordant with the existing literature which indicates that older people  
13 still care about their appearance [37,39]. Body dissatisfaction is evident in midlife [33–36] and may even  
14 increase as older people gain weight and the discrepancy between their ideal and actual body image widens  
15 [38].

16  
17 In addition to appearance, health reasons featured highly among our participants' reasons for wanting to  
18 lose weight, and for many had become increasingly important as they had got older. This is unsurprising,  
19 given that a host of health problems become increasingly prevalent with age [8]. For some participants, fear  
20 of developing chronic diseases such as diabetes or cancer or experiencing an acute event like a heart attack  
21 or stroke was driving their weight loss efforts. Seeing evidence of the adverse health consequences of  
22 carrying excess weight had prompted others to think more seriously about their weight, with many  
23 reporting a desire to alleviate the side effects of existing health problems and reduce the need for  
24 medication.

25  
26 Our participants believed that losing weight could lead to substantial improvements in psychological and  
27 physical health. No concerns about potential adverse health consequences of weight loss were raised,  
28 although one participant felt that some excess weight could be protective in the event of illness. However,  
29 without exception, it was reported that weight management gets increasingly difficult with age. The same  
30 was previously reported in a qualitative study exploring older women's perceptions of ideal body weights  
31 [54]. In our study, many participants described how weight loss strategies they had used successfully when  
32 they were younger no longer yielded the same results. Health problems and loss of stamina and mobility  
33 were commonly cited as barriers to effective weight management, as were a host of factors linked to  
34 retirement. For the majority, retiring had reduced the need to be physically active and increased time  
35 available for food-focused social occasions and sedentary activities, making it more difficult to achieve

1  
2  
3 energy balance. Previous studies using cohort data have observed similar, showing that retirement is  
4 associated with a loss of work-related physical activity that is not fully compensated for by leisure-time  
5 physical activity [55,56], increased time spent watching television [57,58], and increases in body weight and  
6 waist circumference in people retiring from active jobs [59,60]. Loneliness was also mentioned as a barrier  
7 to weight loss, with some people using food as a source of comfort. Loneliness increases with age [61] and is  
8 a common cause of emotional eating, a highly prevalent behaviour among people affected by obesity [62].  
9

10  
11  
12  
13  
14 Health professionals were viewed to have an important role to play in guiding and supporting older people's  
15 weight management efforts, but participants' experiences with seeking and receiving professional help  
16 were varied. While some had received support for weight management from a GP or other health  
17 professional, others reported receiving no advice at all – even when they had sought it out – or a “telling  
18 off” about their weight with no guidance as to how to address the issue. Previous research has found that  
19 health professionals experience numerous barriers to providing weight loss advice, including perceived lack  
20 of time, training, knowledge and confidence [63–69]. In addition, GPs tend to underestimate BMI and  
21 weight status, which makes them less likely to intervene and discuss weight [70]. Consistent with evidence  
22 that weight loss advice from a health professional in primary care is associated weight loss attempts [40,71],  
23 our participants felt that health professional advice would be a powerful motivator and the majority said  
24 they would welcome such advice. While health professionals may be reluctant to encourage weight loss in  
25 older patients due to concerns about associated risks (e.g. loss of muscle mass and bone density) [24,25],  
26 reviews of the literature indicate that weight loss can have significant benefits for physical function and  
27 metabolic and cardiovascular risk [31] and that, on balance, weight loss appears advisable [32]. Our findings  
28 indicate that weight management is an issue of considerable relevance and importance to many older  
29 people, and one for which they would like to receive advice and support. There is therefore a need for  
30 further research to identify ways in which health professionals can best support older patients in addressing  
31 weight issues while minimising risk to health.  
32  
33  
34  
35  
36  
37  
38  
39  
40  
41  
42  
43  
44

45 In conclusion, our findings indicate that older adults consider weight to be an important issue which has a  
46 significant impact on physical and mental health. Weight loss is desired in order to improve appearance and,  
47 increasingly importantly, health, but a range of barriers and limited support from health professionals make  
48 it harder to lose weight successfully at older ages. Health professionals should be encouraged to broach the  
49 issue of weight management with older patients and offer guidance and support to those who want it. The  
50 development of materials – for both health professionals and older adults – providing information on losing  
51  
52  
53  
54  
55  
56  
57  
58  
59  
60

1  
2  
3 weight safely at older ages and ways of managing issues relating to retirement and declining health and  
4 mobility could help address the unmet needs of older people who want help to manage their weight.  
5  
6  
7  
8  
9  
10  
11  
12  
13  
14  
15  
16  
17  
18  
19  
20  
21  
22  
23  
24  
25  
26  
27  
28  
29  
30  
31  
32  
33  
34  
35  
36  
37  
38  
39  
40  
41  
42  
43  
44  
45  
46  
47  
48  
49  
50  
51  
52  
53  
54  
55  
56  
57  
58  
59  
60

For peer review only

## **Funding statement**

This work was supported by a research grant from the Cancer Research UK (ref no. C1418/A14133). RJB is supported by Yorkshire Cancer Research University Academic Fellowship Funding.

## **Competing interests**

None.

## **Contributors**

Everyone listed as an author fulfils all three of the ICMJE guidelines for authorship: (1) substantial contributions to the conception and design, acquisition of data, or analysis and interpretation of data; (2) drafting of the article or revising it critically for important intellectual content; and (3) final approval of the version to be published. SEJ and RJB were responsible for the study concept and design. LH acquired the data. SEJ, LH and RJB analysed and interpreted the data. SEJ drafted the manuscript, and all authors revised it for important intellectual content. All the authors had final approval of the version to be published.

## **Data sharing statement**

Anonymised interview transcripts can be obtained by the corresponding author on reasonable request.

## References

- 1 National Center for Health Statistics. *Health, United States, 2007: With Chartbook on Trends in the Health of Americans*. Hyattsville, MD: 2007.
- 2 Office for National Statistics. Population Ageing in the United Kingdom, its Constituent Countries and the European Union. Off. Natl. Stat. 2012.<http://www.ons.gov.uk/ons/rel/mortality-ageing/focus-on-older-people/population-ageing-in-the-united-kingdom-and-europe/rpt-age-uk-eu.html#tab-Associated-links> (accessed 14 Nov 2012).
- 3 Fakhouri TH, Ogden CL, Carroll MD. *Prevalence of obesity among older adults in the United States, 2007-2010. NCHS data brief, no 106*. Hyattsville, MD: : National Center for Health Statistics 2012. <http://www.cdc.gov/nchs/data/databriefs/db106.htm#ref1> (accessed 14 Nov 2012).
- 4 Health & Social Care Information Centre. Health Survey for England - 2010: Trend tables. 2010.<http://www.hscic.gov.uk/pubs/hse10trends> (accessed 21 Jul 2014).
- 5 Flegal KM, Carroll MD, Kit BK, *et al*. Prevalence of Obesity and Trends in the Distribution of Body Mass Index Among US Adults, 1999-2010. *JAMA J Am Med Assoc* 2012;**307**:491–7. doi:10.1001/jama.2012.39
- 6 Wang YC, McPherson K, Marsh T, *et al*. Health and economic burden of the projected obesity trends in the USA and the UK. *The Lancet* 2011;**378**:815–25. doi:10.1016/S0140-6736(11)60814-3
- 7 Vincent GK, Velkoff VA. *The next four decades: the older population in the United States: 2010 to 2050*. US Department of Commerce, Economics and Statistics Administration, US Census Bureau 2010.
- 8 World Health Organization. Global health and ageing. WHO. 2011.[http://www.who.int/ageing/publications/global\\_health/en/](http://www.who.int/ageing/publications/global_health/en/) (accessed 31 Mar 2017).
- 9 Centers for Disease Control and Prevention. *Healthy Aging: Preventing Disease and Improving Quality of Life Among Older Americans 2003*. Department of Health and Human Services 2003. <http://www.cdc.gov/chronicdisease/resources/publications/aag/aging.htm> (accessed 14 Nov 2012).
- 10 Davison KK, Ford ES, Cogswell ME, *et al*. Percentage of Body Fat and Body Mass Index Are Associated with Mobility Limitations in People Aged 70 and Older from NHANES III. *J Am Geriatr Soc* 2002;**50**:1802–1809. doi:10.1046/j.1532-5415.2002.50508.x
- 11 Jensen GL, Friedmann JM. Obesity Is Associated with Functional Decline in Community-Dwelling Rural Older Persons. *J Am Geriatr Soc* 2002;**50**:918–923. doi:10.1046/j.1532-5415.2002.50220.x
- 12 Launer LJ, Harris T, Rumpel C, *et al*. Body mass index, weight change, and risk of mobility disability in middle-aged and older women. The epidemiologic follow-up study of NHANES I. *JAMA J Am Med Assoc* 1994;**271**:1093–8.
- 13 Visser M, Langlois J, Guralnik JM, *et al*. High body fatness, but not low fat-free mass, predicts disability in older men and women: the Cardiovascular Health Study. *Am J Clin Nutr* 1998;**68**:584–90.
- 14 Wanless D. Securing good health for the whole population. *Lond HM Treas* 2004;**4**:2003–2004.

- 1  
2  
3 15 Armamento-Villareal R, Sadler C, Napoli N, *et al.* Weight loss in obese older adults increases serum  
4 sclerostin and impairs hip geometry but both are prevented by exercise training. *J Bone Miner Res*  
5 2012;**27**:1215–1221. doi:10.1002/jbmr.1560  
6  
7 16 Frimel TN, Sinacore DR, Villareal DT. Exercise Attenuates the Weight-Loss-Induced Reduction in Muscle  
8 Mass in Frail Obese Older Adults. *Med Sci Sports Exerc* 2008;**40**:1213–9.  
9 doi:10.1249/MSS.0b013e31816a85ce  
10  
11 17 Villareal DT, Chode S, Parimi N, *et al.* Weight Loss, Exercise, or Both and Physical Function in Obese  
12 Older Adults. *N Engl J Med* 2011;**364**:1218–29. doi:10.1056/NEJMoa1008234  
13  
14 18 Villareal DT, Banks M, Sinacore DR, *et al.* Effect of Weight Loss and Exercise on Frailty in Obese Older  
15 Adults. *Arch Intern Med* 2006;**166**:860–6. doi:10.1001/archinte.166.8.860  
16  
17 19 Villareal DT, Shah K, Banks MR, *et al.* Effect of Weight Loss and Exercise Therapy on Bone Metabolism  
18 and Mass in Obese Older Adults: A One-Year Randomized Controlled Trial. *J Clin Endocrinol Metab*  
19 2008;**93**:2181–7. doi:10.1210/jc.2007-1473  
20  
21 20 Bales CW, Buhr G. Is obesity bad for older persons? A systematic review of the pros and cons of weight  
22 reduction in later life. *J Am Med Dir Assoc* 2008;**9**:302–12. doi:10.1016/j.jamda.2008.01.006  
23  
24 21 Inelmen EM, Sergi G, Coin A, *et al.* Can obesity be a risk factor in elderly people? *Obes Rev Off J Int*  
25 *Assoc Study Obes* 2003;**4**:147–55.  
26  
27 22 Janssen I. Morbidity and Mortality Risk Associated With an Overweight BMI in Older Men and Women.  
28 *Obesity* 2007;**15**:1827–1840. doi:10.1038/oby.2007.217  
29  
30 23 Allison DB, Gallagher D, Heo M, *et al.* Body mass index and all-cause mortality among people age 70 and  
31 over: the Longitudinal Study of Aging. *Int J Obes Relat Metab Disord J Int Assoc Study Obes*  
32 1997;**21**:424–31.  
33  
34 24 Houston DK, Nicklas BJ, Zizza CA. Weighty Concerns: The Growing Prevalence of Obesity among Older  
35 Adults. *J Am Diet Assoc* 2009;**109**:1886–95. doi:10.1016/j.jada.2009.08.014  
36  
37 25 Sommers A. U.S. Congressional Research Service: obesity among older Americans.  
38 2011. [http://www.legistorm.com/score\\_crs/show/id/104646.html](http://www.legistorm.com/score_crs/show/id/104646.html) (accessed 18 Apr 2013).  
39  
40 26 French SA, Folsom AR, Jeffery RW, *et al.* Prospective study of intentionality of weight loss and mortality  
41 in older women: the Iowa Women's Health study. *Am J Epidemiol* 1999;**149**:504–514.  
42  
43 27 Ingram DD, Mussolino ME. Weight loss from maximum body weight and mortality: the Third National  
44 Health and Nutrition Examination Survey Linked Mortality File. *Int J Obes* 2005 2010;**34**:1044–50.  
45 doi:10.1038/ijo.2010.41  
46  
47 28 Villareal DT, Apovian CM, Kushner RF, *et al.* Obesity in older adults: technical review and position  
48 statement of the American Society for Nutrition and NAASO, The Obesity Society. *Am J Clin Nutr*  
49 2005;**82**:923–34.  
50  
51  
52  
53  
54  
55  
56  
57  
58  
59  
60

- 1  
2  
3 29 Shea MK, Houston DK, Nicklas BJ, *et al.* The effect of randomization to weight loss on total mortality in  
4 older overweight and obese adults: the ADAPT Study. *J Gerontol A Biol Sci Med Sci* 2010;**65**:519–25.  
5 doi:10.1093/gerona/glp217  
6
- 7 30 Wannamethee SG, Shaper AG, Lennon L. Reasons for intentional weight loss, unintentional weight loss,  
8 and mortality in older men. *Arch Intern Med* 2005;**165**:1035–40. doi:10.1001/archinte.165.9.1035  
9
- 10 31 Waters DL, Ward AL, Villareal DT. Weight loss in obese adults 65years and older: A review of the  
11 controversy. *Exp Gerontol* Published Online First: 9 February 2013. doi:10.1016/j.exger.2013.02.005  
12  
13
- 14 32 Felix HC, West DS. Effectiveness of weight loss interventions for obese older adults. *Am J Health Promot*  
15 *AJHP* 2013;**27**:191–9. doi:10.4278/ajhp.110617-LIT-259  
16
- 17 33 Tiggemann M. Body image across the adult life span: stability and change. *Body Image* 2004;**1**:29–41.  
18 doi:10.1016/S1740-1445(03)00002-0  
19
- 20 34 Webster J, Tiggemann M. The Relationship Between Women’s Body Satisfaction and Self-Image Across  
21 the Life Span: The Role of Cognitive Control. *J Genet Psychol* 2003;**164**:241–52.  
22 doi:10.1080/00221320309597980  
23
- 24 35 Lamb CS, Jackson LA, Cassiday PB, *et al.* Body figure preferences of men and women: A comparison of  
25 two generations. *Sex Roles* 1993;**28**:345–58. doi:10.1007/BF00289890  
26  
27
- 28 36 Rozin P, Fallon A. Body image, attitudes to weight, and misperceptions of figure preferences of the  
29 opposite sex: a comparison of men and women in two generations. *J Abnorm Psychol* 1988;**97**:342–5.  
30
- 31 37 Gosselink CA, Cox DL, McClure SJ, *et al.* Ravishing or ravaged: women’s relationships with women in the  
32 context of aging and Western beauty culture. *Int J Aging Hum Dev* 2008;**66**:307–27.  
33 doi:10.2190/AG.66.4.c  
34
- 35 38 Tiggemann M. Body-size dissatisfaction: Individual differences in age and gender, and relationship with  
36 self-esteem. *Personal Individ Differ* 1992;**13**:39–43. doi:10.1016/0191-8869(92)90215-B  
37  
38
- 39 39 Beeken RJ, Mahdi S, Johnson F, *et al.* Intentions to Prevent Weight Gain in Older and Younger Adults;  
40 The Importance of Perceived Health and Appearance Consequences. *Obes Facts* 2018;**11**:83–92.  
41 doi:10.1159/000486961  
42
- 43 40 Jackson SE, Wardle J, Johnson F, *et al.* The impact of a health professional recommendation on weight  
44 loss attempts in overweight and obese British adults: a cross-sectional analysis. *BMJ Open*  
45 2013;**3**:e003693. doi:10.1136/bmjopen-2013-003693  
46
- 47 41 Holliday D. Analysing qualitative data. In: *Continuum companion to research methods in applied*  
48 *linguistics*. Australia: : Continuum 2010. 98–110.  
49
- 50 42 Winter Falk L, Bisogni CA, Sobal J. Food Choice Processes of Older Adults: A Qualitative Investigation. *J*  
51 *Nutr Educ* 1996;**28**:257–65. doi:10.1016/S0022-3182(96)70098-5  
52  
53
- 54 43 Jancey JM, Clarke A, Howat P, *et al.* Perceptions of physical activity by older adults: A qualitative study.  
55 *Health Educ J* 2009;**68**:196–206. doi:10.1177/0017896909339531  
56  
57  
58  
59  
60

- 1  
2  
3 44 Oppenheim AN. *Questionnaire design, interviewing and attitude measurement*. Bloomsbury Publishing  
4 2000.  
5 [https://books.google.co.uk/books?hl=en&lr=&id=6V4GnZS7TO4C&oi=fnd&pg=PA5&dq=oppenheim+Qu](https://books.google.co.uk/books?hl=en&lr=&id=6V4GnZS7TO4C&oi=fnd&pg=PA5&dq=oppenheim+Questionnaire+design,+interviewing+and+attitude+measurement.&ots=sBK5bm_GbJ&sig=6MZvLwLSk0iaZRPqIOIZYISQ570)  
6 [estionnaire+design,+interviewing+and+attitude+measurement.&ots=sBK5bm\\_GbJ&sig=6MZvLwLSk0iaZ](https://books.google.co.uk/books?hl=en&lr=&id=6V4GnZS7TO4C&oi=fnd&pg=PA5&dq=oppenheim+Questionnaire+design,+interviewing+and+attitude+measurement.&ots=sBK5bm_GbJ&sig=6MZvLwLSk0iaZRPqIOIZYISQ570)  
7 [RPqIOIZYISQ570](https://books.google.co.uk/books?hl=en&lr=&id=6V4GnZS7TO4C&oi=fnd&pg=PA5&dq=oppenheim+Questionnaire+design,+interviewing+and+attitude+measurement.&ots=sBK5bm_GbJ&sig=6MZvLwLSk0iaZRPqIOIZYISQ570) (accessed 25 Jan 2017).  
8  
9  
10 45 Braun V, Clarke V. Using thematic analysis in psychology. *Qual Res Psychol* 2006;**3**:77–101.  
11 doi:10.1191/1478088706qp063oa  
12  
13 46 Tong A, Sainsbury P, Craig J. Consolidated criteria for reporting qualitative research (COREQ): a 32-item  
14 checklist for interviews and focus groups. *Int J Qual Health Care* 2007;**19**:349–57.  
15 doi:10.1093/intqhc/mzm042  
16  
17 47 Morse JM. Determining Sample Size. *Qual Health Res* 2000;**10**:3–5. doi:10.1177/104973200129118183  
18  
19 48 Irvine A. Duration, Dominance and Depth in Telephone and Face-to-Face Interviews: A Comparative  
20 Exploration. *Int J Qual Methods* 2011;**10**:202–20. doi:10.1177/160940691101000302  
21  
22 49 Bedford JL, Johnson CS. Societal Influences on Body Image Dissatisfaction in Younger and Older Women.  
23 *J Women Aging* 2006;**18**:41–55. doi:10.1300/J074v18n01\_04  
24  
25 50 Dunkel TM, Davidson D, Qurashi S. Body satisfaction and pressure to be thin in younger and older  
26 Muslim and non-Muslim women: The role of Western and non-Western dress preferences. *Body Image*  
27 2010;**7**:56–65. doi:10.1016/j.bodyim.2009.10.003  
28  
29 51 Clarke LCH. Beauty in Later Life: Older Women's Perceptions of Physical Attractiveness. *Can J Aging Rev*  
30 *Can Vieil* 2002;**21**:429–42. doi:10.1017/S0714980800001744  
31  
32 52 Puhl RM, Andreyeva T, Brownell KD. Perceptions of weight discrimination: prevalence and comparison  
33 to race and gender discrimination in America. *Int J Obes* 2008;**32**:992–1000. doi:10.1038/ijo.2008.22  
34  
35 53 Jackson SE, Steptoe A, Beeken RJ, *et al*. Perceived weight discrimination in England: a population-based  
36 study of adults aged  $\geq 50$  years. *Int J Obes* 2015;**39**:858–64. doi:10.1038/ijo.2014.186  
37  
38 54 Clarke LH. Older women's perceptions of ideal body weights: the tensions between health and  
39 appearance motivations for weight loss. *Ageing Soc* 2002;**22**:751–773.  
40  
41 55 Slingerland AS, Lenthe FJ van, Jukema JW, *et al*. Aging, Retirement, and Changes in Physical Activity:  
42 Prospective Cohort Findings from the GLOBE Study. *Am J Epidemiol* 2007;**165**:1356–63.  
43 doi:10.1093/aje/kwm053  
44  
45 56 Berger U, Der G, Mutrie N, *et al*. The impact of retirement on physical activity. *Ageing Soc* 2005;**25**:181–  
46 195.  
47  
48 57 Touvier M, Bertrais S, Charreire H, *et al*. Changes in leisure-time physical activity and sedentary  
49 behaviour at retirement: a prospective study in middle-aged French subjects. *Int J Behav Nutr Phys Act*  
50 2010;**7**:14.  
51  
52  
53  
54  
55  
56  
57  
58  
59  
60

- 1  
2  
3 58 Evenson KR, Rosamond WD, Cai J, *et al.* Influence of Retirement on Leisure-time Physical ActivityThe  
4 Atherosclerosis Risk in Communities Study. *Am J Epidemiol* 2002;**155**:692–9. doi:10.1093/aje/155.8.692  
5  
6  
7 59 Nooyens AC, Visscher TL, Schuit AJ, *et al.* Effects of retirement on lifestyle in relation to changes in  
8 weight and waist circumference in Dutch men: a prospective study. *Public Health Nutr* 2005;**8**:1266–74.  
9 doi:10.1079/PHN2005756  
10  
11 60 Zaninotto P, Jackson S, Jackowska M, *et al.* Trends in obesity among older people in England. In: *The*  
12 *Dynamics of Ageing: Evidence from the English Longitudinal Study of Ageing 2002 – 2012 (Wave 6)*.  
13 London: 2014. [http://www.elsa-](http://www.elsa-project.ac.uk/uploads/elsa/docs_w6/ELSA%20Wave%206%20report.pdf)  
14 [project.ac.uk/uploads/elsa/docs\\_w6/ELSA%20Wave%206%20report.pdf](http://www.elsa-project.ac.uk/uploads/elsa/docs_w6/ELSA%20Wave%206%20report.pdf)  
15  
16  
17 61 Pinguart M, Sörensen S. Risk factors for loneliness in adulthood and old age--a meta-analysis. In:  
18 *Advances in psychology research, Vol. 19*. Hauppauge, NY, US: : Nova Science Publishers 2003. 111–43.  
19  
20 62 Levine MP. Loneliness and Eating Disorders. *J Psychol* 2012;**146**:243–57.  
21 doi:10.1080/00223980.2011.606435  
22  
23 63 Hiddink GJ, Hautvast JG, van Woerkum CM, *et al.* Nutrition guidance by primary-care physicians:  
24 perceived barriers and low involvement. *Eur J Clin Nutr* 1995;**49**:842–51.  
25  
26 64 Harris JE, Hamaday V, Mochan E. Osteopathic family physicians' attitudes, knowledge, and self-reported  
27 practices regarding obesity. *J Am Osteopath Assoc* 1999;**99**:358–65.  
28  
29 65 Ruelaz AR, Diefenbach P, Simon B, *et al.* Perceived Barriers to Weight Management in Primary Care--  
30 Perspectives of Patients and Providers. *J Gen Intern Med* 2007;**22**:518–22. doi:10.1007/s11606-007-  
31 0125-4  
32  
33 66 Kenner MM, Taylor ML, Dunn PC, *et al.* Primary Care Providers Need a Variety of Nutrition and Wellness  
34 Patient Education Materials. *J Am Diet Assoc* 1999;**99**:462–6. doi:10.1016/S0002-8223(99)00113-3  
35  
36  
37 67 Leverence RR, Williams RL, Sussman A, *et al.* Obesity counseling and guidelines in primary care: a  
38 qualitative study. *Am J Prev Med* 2007;**32**:334–9. doi:10.1016/j.amepre.2006.12.008  
39  
40 68 Foster GD, Wadden TA, Makris AP, *et al.* Primary care physicians' attitudes about obesity and its  
41 treatment. *Obes Res* 2003;**11**:1168–77. doi:10.1038/oby.2003.161  
42  
43 69 Michie S. Talking to primary care patients about weight: A study of GPs and practice nurses in the UK.  
44 *Psychol Health Med* 2007;**12**:521–5. doi:10.1080/13548500701203441  
45  
46 70 Robinson E, Parretti H, Aveyard P. Visual identification of obesity by healthcare professionals: an  
47 experimental study of trainee and qualified GPs. *Br J Gen Pract J R Coll Gen Pract* 2014;**64**:e703-708.  
48 doi:10.3399/bjgp14X682285  
49  
50 71 Rose SA, Poynter PS, Anderson JW, *et al.* Physician weight loss advice and patient weight loss behavior  
51 change: a literature review and meta-analysis of survey data. *Int J Obes* 2005 2013;**37**:118–28.  
52 doi:10.1038/ijo.2012.24  
53  
54  
55  
56  
57  
58  
59

1  
2  
3  
4  
5  
6  
7  
8  
9  
10  
11  
12  
13  
14  
15  
16  
17  
18  
19  
20  
21  
22  
23  
24  
25  
26  
27  
28  
29  
30  
31  
32  
33  
34  
35  
36  
37  
38  
39  
40  
41  
42  
43  
44  
45  
46  
47  
48  
49  
50  
51  
52  
53  
54  
55  
56  
57  
58  
59  
60

For peer review only

## Tables

**Table 1.** Topic guide for qualitative interviews

| Topics                                                |                                    | Prompts                                                                                                               |
|-------------------------------------------------------|------------------------------------|-----------------------------------------------------------------------------------------------------------------------|
| Introductions and background                          | Introductions                      | Who we are and aim of study<br>Check length of interview (30-60 mins) ok                                              |
| Experiences of weight management                      | Weight history                     | Brief overview of weight across the life course<br>Always struggled with weight?                                      |
|                                                       | Recent attempts at weight loss     | Methods<br>Success                                                                                                    |
|                                                       | Any changes with age               | Methods<br>How easy it is<br>Success/achieving goals<br>Reasons (or perceived reasons) for any changes                |
| Motivation to lose weight                             | Reasons for losing weight          | Appearance reasons<br>Health reasons<br>Doctor's advice<br>Family and friends                                         |
|                                                       | Any changes with age               | Amount of motivation<br>Reasons for losing weight<br>In what way?                                                     |
|                                                       | Personal importance of weight      | Impact on life/health/wellbeing<br>Has it changed with age?                                                           |
| Barriers to losing weight                             | Current barriers                   | Lack of willpower<br>Lack of support<br>Financial issues<br>Health problems<br>Social life                            |
|                                                       | Any changes in barriers with age   |                                                                                                                       |
| Appropriateness of weight management for older people | Own views                          | Something you can/should be doing?                                                                                    |
|                                                       | Perception of other people's views | Something you can/should be doing?<br>Is it something family/friends encourage?<br>Guidance from health professionals |

**Table 2.** Socio-demographic and health characteristics

| Socio-demographic details          | Total sample (n=15)            |
|------------------------------------|--------------------------------|
| Sex, n (%)                         |                                |
| Male                               | 3 (20.0)                       |
| Female                             | 12 (80.0)                      |
| Age (years), mean $\pm$ SD (range) | 71.07 $\pm$ 5.24 (60–84)       |
| Ethnicity, n (%)                   |                                |
| White British                      | 11 (73.3)                      |
| White Irish                        | 1 (6.7)                        |
| White other                        | 3 (20.0)                       |
| BMI, mean $\pm$ SD (range)         | 30.15 $\pm$ 5.43 (23.29–40.38) |
| Weight status, n (%)               |                                |
| Normal weight                      | 2 (13.3)                       |
| Overweight                         | 8 (53.3)                       |
| Obese                              | 5 (33.3)                       |

BMI, body mass index.

## COREQ (CONsolidated criteria for REporting Qualitative research) Checklist

A checklist of items that should be included in reports of qualitative research. You must report the page number in your manuscript where you consider each of the items listed in this checklist. If you have not included this information, either revise your manuscript accordingly before submitting or note N/A.

| Topic                                          | Item No. | Guide Questions/Description                                                                                                                              | Reported on Page No. |
|------------------------------------------------|----------|----------------------------------------------------------------------------------------------------------------------------------------------------------|----------------------|
| <b>Domain 1: Research team and reflexivity</b> |          |                                                                                                                                                          |                      |
| <i>Personal characteristics</i>                |          |                                                                                                                                                          |                      |
| Interviewer/facilitator                        | 1        | Which author/s conducted the interview or focus group?                                                                                                   |                      |
| Credentials                                    | 2        | What were the researcher's credentials? E.g. PhD, MD                                                                                                     |                      |
| Occupation                                     | 3        | What was their occupation at the time of the study?                                                                                                      |                      |
| Gender                                         | 4        | Was the researcher male or female?                                                                                                                       |                      |
| Experience and training                        | 5        | What experience or training did the researcher have?                                                                                                     |                      |
| <i>Relationship with participants</i>          |          |                                                                                                                                                          |                      |
| Relationship established                       | 6        | Was a relationship established prior to study commencement?                                                                                              |                      |
| Participant knowledge of the interviewer       | 7        | What did the participants know about the researcher? e.g. personal goals, reasons for doing the research                                                 |                      |
| Interviewer characteristics                    | 8        | What characteristics were reported about the interviewer/facilitator? e.g. Bias, assumptions, reasons and interests in the research topic                |                      |
| <b>Domain 2: Study design</b>                  |          |                                                                                                                                                          |                      |
| <i>Theoretical framework</i>                   |          |                                                                                                                                                          |                      |
| Methodological orientation and Theory          | 9        | What methodological orientation was stated to underpin the study? e.g. grounded theory, discourse analysis, ethnography, phenomenology, content analysis |                      |
| <i>Participant selection</i>                   |          |                                                                                                                                                          |                      |
| Sampling                                       | 10       | How were participants selected? e.g. purposive, convenience, consecutive, snowball                                                                       |                      |
| Method of approach                             | 11       | How were participants approached? e.g. face-to-face, telephone, mail, email                                                                              |                      |
| Sample size                                    | 12       | How many participants were in the study?                                                                                                                 |                      |
| Non-participation                              | 13       | How many people refused to participate or dropped out? Reasons?                                                                                          |                      |
| <i>Setting</i>                                 |          |                                                                                                                                                          |                      |
| Setting of data collection                     | 14       | Where was the data collected? e.g. home, clinic, workplace                                                                                               |                      |
| Presence of non-participants                   | 15       | Was anyone else present besides the participants and researchers?                                                                                        |                      |
| Description of sample                          | 16       | What are the important characteristics of the sample? e.g. demographic data, date                                                                        |                      |
| <i>Data collection</i>                         |          |                                                                                                                                                          |                      |
| Interview guide                                | 17       | Were questions, prompts, guides provided by the authors? Was it pilot tested?                                                                            |                      |
| Repeat interviews                              | 18       | Were repeat interviews carried out? If yes, how many?                                                                                                    |                      |
| Audio/visual recording                         | 19       | Did the research use audio or visual recording to collect the data?                                                                                      |                      |
| Field notes                                    | 20       | Were field notes made during and/or after the interview or focus group?                                                                                  |                      |
| Duration                                       | 21       | What was the duration of the interviews or focus group?                                                                                                  |                      |
| Data saturation                                | 22       | Was data saturation discussed?                                                                                                                           |                      |
| Transcripts returned                           | 23       | Were transcripts returned to participants for comment and/or                                                                                             |                      |

| Topic                                  | Item No. | Guide Questions/Description                                                                                                        | Reported on Page No. |
|----------------------------------------|----------|------------------------------------------------------------------------------------------------------------------------------------|----------------------|
|                                        |          | correction?                                                                                                                        |                      |
| <b>Domain 3: analysis and findings</b> |          |                                                                                                                                    |                      |
| <i>Data analysis</i>                   |          |                                                                                                                                    |                      |
| Number of data coders                  | 24       | How many data coders coded the data?                                                                                               |                      |
| Description of the coding tree         | 25       | Did authors provide a description of the coding tree?                                                                              |                      |
| Derivation of themes                   | 26       | Were themes identified in advance or derived from the data?                                                                        |                      |
| Software                               | 27       | What software, if applicable, was used to manage the data?                                                                         |                      |
| Participant checking                   | 28       | Did participants provide feedback on the findings?                                                                                 |                      |
| <i>Reporting</i>                       |          |                                                                                                                                    |                      |
| Quotations presented                   | 29       | Were participant quotations presented to illustrate the themes/findings?<br>Was each quotation identified? e.g. participant number |                      |
| Data and findings consistent           | 30       | Was there consistency between the data presented and the findings?                                                                 |                      |
| Clarity of major themes                | 31       | Were major themes clearly presented in the findings?                                                                               |                      |
| Clarity of minor themes                | 32       | Is there a description of diverse cases or discussion of minor themes?                                                             |                      |

Developed from: Tong A, Sainsbury P, Craig J. Consolidated criteria for reporting qualitative research (COREQ): a 32-item checklist for interviews and focus groups. *International Journal for Quality in Health Care*. 2007. Volume 19, Number 6: pp. 349 – 357

**Once you have completed this checklist, please save a copy and upload it as part of your submission. DO NOT include this checklist as part of the main manuscript document. It must be uploaded as a separate file.**

# BMJ Open

## 'Just because I'm old it doesn't mean I have to be fat': A qualitative study exploring older adults' views and experiences of weight management

|                                 |                                                                                                                                                                                                                                                                                              |
|---------------------------------|----------------------------------------------------------------------------------------------------------------------------------------------------------------------------------------------------------------------------------------------------------------------------------------------|
| Journal:                        | <i>BMJ Open</i>                                                                                                                                                                                                                                                                              |
| Manuscript ID                   | bmjopen-2018-025680.R1                                                                                                                                                                                                                                                                       |
| Article Type:                   | Research                                                                                                                                                                                                                                                                                     |
| Date Submitted by the Author:   | 14-Dec-2018                                                                                                                                                                                                                                                                                  |
| Complete List of Authors:       | Jackson, Sarah ; University College London, Epidemiology and Public Health;<br>Holter, Linn; University College London, Behavioural Science and Health<br>Beeken, Rebecca; University College London, Behavioural Science and Health; University of Leeds Leeds Institute of Health Sciences |
| <b>Primary Subject Heading</b>: | Geriatric medicine                                                                                                                                                                                                                                                                           |
| Secondary Subject Heading:      | Nutrition and metabolism, Public health, Qualitative research                                                                                                                                                                                                                                |
| Keywords:                       | GERIATRIC MEDICINE, NUTRITION & DIETETICS, PRIMARY CARE, PREVENTIVE MEDICINE, PUBLIC HEALTH, QUALITATIVE RESEARCH                                                                                                                                                                            |
|                                 |                                                                                                                                                                                                                                                                                              |

SCHOLARONE™  
Manuscripts

1  
2  
3  
4  
5 **'Just because I'm old it doesn't mean I have to be fat': A qualitative study**  
6 **exploring older adults' views and experiences of weight management**  
7  
8  
9

10  
11 **Sarah E. Jackson<sup>1</sup>, Linn Holter<sup>1</sup>, Rebecca J. Beeken<sup>1,2</sup>**  
12

13  
14  
15  
16 <sup>1</sup>Department of Behavioural Science and Health, University College London, London, UK  
17

18 <sup>2</sup>Leeds Institute of Health Sciences, University of Leeds, Leeds, UK  
19  
20  
21  
22

23 **Key words:** older adults; elderly; weight loss; weight management; qualitative  
24  
25  
26

27 **Corresponding author**  
28

29 Sarah E Jackson, PhD. Department of Behavioural Science and Health, University College London, 1-19  
30

31 Torrington Place, London WC1E 6BT. Tel: (44) 207 679 5616. [s.e.jackson@ucl.ac.uk](mailto:s.e.jackson@ucl.ac.uk)  
32  
33  
34  
35  
36  
37  
38  
39  
40  
41  
42  
43  
44  
45  
46  
47  
48  
49  
50  
51  
52  
53  
54  
55  
56  
57  
58  
59  
60

## Abstract

**Objectives:** The aim of this study was to explore older adults' beliefs about the appropriateness of weight management, and how their experiences and expectations of weight management have changed as they have got older.

**Design:** Qualitative semi-structured interview study.

**Setting:** United Kingdom.

**Participants:** Older adults ( $\geq 65$  years) in the United Kingdom who had recent ( $< 5$  years) experience of trying to manage their weight ( $n=15$ ; 12 women, 3 men; 73% White British).

**Results:** Data were analysed using thematic analysis. Emergent themes highlighted that weight remained a concern for many older adults, although having a high body weight was seen to be more acceptable at older than younger ages. Excess weight was reported to have negative consequences for health and wellbeing which participants felt could be alleviated by losing weight. Participants were motivated to lose weight for appearance and health reasons, but mentioned finding it harder to lose weight as they had got older and generally felt they had received limited guidance on weight management from health professionals.

**Conclusions:** The views of our participants highlight the need for further research into safe and effective methods of weight loss for older people and indicate that advice and support from health professionals would be welcomed.

## Strengths and limitations of this study

- This study offers insight into older adults' experiences of and attitudes towards weight management.
- The sample size was small but comparable with other qualitative studies.
- Self-selection bias may explain the generally positive attitudes towards weight management.
- Our findings do not reflect the views of non-white ethnic groups in which attitudes towards weight and ageing may differ.
- These results provide some encouragement for health professionals unsure about discussing weight management with older patients; indicating advice is likely to be well received.

## Introduction

The last three decades have seen a substantial rise in the number of older people affected by overweight and obesity, as a result of increases both in the total number of older adults [1,2] and the proportion who are carrying excess weight [3,4]. Repeat cross-sectional data from the National Health and Nutrition Examination Survey (NHANES) in the US and the Health Survey for England indicate that although obesity is becoming increasingly prevalent across all age groups, there is a trend for greater rises among older ( $\geq 55$  years) than among younger adults, with levels reaching 40% (vs. 35%) in the US [5] and 32% (vs. 23%) in England in 2010 [4]. Based on recent trends, and allowing for the ageing populations in each country, a striking simulation study projected that there would be a further 65 million obese adults in the US by the year 2030, of whom 24 million would be aged  $\geq 60$  years, and an additional 11 million in the UK, of whom 3.3 million would be aged  $\geq 60$  years [6]. However even without further rises in obesity prevalence, the number of older adults affected by obesity looks set to grow as the population continues to age [7].

For the older population, carrying excess weight comes with additional health risks. A substantial number of the medical complications associated with overweight and obesity become increasingly prevalent with age [8]. Around 80% of older people have at least one chronic health problem, and 50% have two or more [9]. Obesity also exacerbates the age-related decline in physical function: among older men and women, high body weight and excess body fat mass are related to increased physical dysfunction and disability [10] and strongly predict decline in functional status and future disability [11–13]. If past trends in obesity prevalence continue, the annual costs of obesity-related diseases are projected to rise by 13–16% in the US by 2030, of which 4% will be attributable to population ageing alone, and by 24–25% in the UK, of which 10% will be attributable to ageing alone [6]. An increase of this nature in the UK is a real threat to the future affordability of the NHS [14].

Given the considerable burden of obesity among older people, one might expect weight management for older people to be an urgent public health priority. However, there has been relatively little research into how best to promote and achieve healthy weight loss among older adults, and whether weight loss is even indicated for those at older ages is a controversial issue that has attracted considerable attention. Although studies have demonstrated that older people (aged  $\geq 65$  years) can achieve significant weight loss [15–19], losses of lean body mass and bone mineral density frequently accompany reductions in fat mass [15–20]. In addition, there is some evidence that the morbidity and mortality risk associated with excess weight decreases with advancing age [21–23]. As a result, there is uncertainty as to whether the benefits of losing

1  
2  
3 weight outweigh the risks, and medical professionals are often reluctant to advise that older patients  
4 affected by obesity should lose weight [24,25]. However, studies that report associations between weight  
5 loss and mortality among older adults with obesity often fail to take into account intentionality of weight  
6 loss [26–28]. Intentional weight loss does not appear to be associated with increased risk of mortality  
7 [26,29,30]. Furthermore, a review on weight loss in adults with obesity aged  $\geq 65$  years found evidence that  
8 in spite of losses of fat-free mass and bone density, lifestyle interventions lead to positive changes in body  
9 composition, physical function, and metabolic and cardiovascular risk [31]. Another review of the  
10 effectiveness of weight loss interventions for older adults with obesity concluded that despite the  
11 controversy, weight loss appears advisable, and the authors encouraged healthcare providers to target  
12 older adults with obesity who could benefit from participating in weight loss interventions [32].  
13  
14  
15  
16  
17  
18  
19  
20

21 Perhaps unsurprisingly in light of the limited evidence base on weight loss in the older population, little is  
22 known about older adults' own attitudes towards weight management. Studies comparing body image  
23 concerns of older and younger women suggest that body weight, and appearance in general, remain  
24 important as people get older [33–37]. In fact, as people get older and put on weight, their actual body  
25 image becomes increasingly discordant with their ideal body image and body dissatisfaction may even  
26 increase [38]. In addition, health concerns may become more salient with age, motivating older people to  
27 take action to tackle their weight [39]. Survey data indicate that losing weight is something that many older  
28 adults want, and are trying, to do. In a population-representative survey of British adults, older participants  
29 ( $\geq 55$  years) were equally as likely as their younger counterparts to report a desire to weigh less, although  
30 they were only about half as likely to currently be attempting to lose weight [40]. The reasons for these  
31 seemingly discrepant findings have yet to be established.  
32  
33  
34  
35  
36  
37  
38  
39

40 A clear understanding of older adults' attitudes towards weight management, including beliefs about the  
41 appropriateness of weight management at older ages, is needed. Moreover, in-depth insight into older  
42 people's experiences of trying to manage their weight and expectations relating to weight management  
43 attempts, and how these change with age, is required. Understanding these concepts may aid in the  
44 development of successful interventions to promote weight control in this population. The present study  
45 therefore aimed to explore older adults' attitudes towards and experiences and expectations of weight  
46 management. A qualitative design was chosen because we were not seeking to test a hypothesis, but rather  
47 to obtain a rich source of information to better understand the rationale behind attitudes towards weight  
48 loss, and experiences and expectations of weight management at older ages [41].  
49  
50  
51  
52  
53  
54  
55  
56  
57  
58  
59  
60

## Method

### Participants and recruitment

Our inclusion criteria were older adults (age  $\geq 65$  years) living in the United Kingdom, who had recent (<5 years) experience of weight management. We excluded individuals who had any cognitive impairment that might prohibit their ability to recall their weight management experience or to give informed consent (e.g. dementia). We chose to use interviews rather than focus groups as we were interested in learning about people's individual beliefs and experiences, rather than determining a group consensus. We did not want group discussions or concerns that others might view their beliefs to be "incorrect" to influence individuals' accounts of their own unique experiences.

The study was advertised via posters and flyers displayed in and around University College London and at charities and local community centres that hold targeted activities for older adults. Interested and eligible participants were given an information sheet and the opportunity to ask questions. We offered the option of conducting the interview face-to-face (at the university) or over the telephone to encourage individuals to take part who might have otherwise been put off by a lack of flexibility around time (e.g. because of work or personal commitments) or location (e.g. because of distance or ability to travel), or difficulties in hearing accurately on the telephone. A consent form and brief socio-demographic questionnaire were mailed for completion before the interview took place. We aimed to recruit until it was felt that saturation had been reached (i.e. sampling more data would not provide more information or insights related to our research questions). Based on previous qualitative studies in similar groups, we expected that around 15 participants would be required to achieve this [42,43], although no target number of participants was set. All interviews were conducted with only the participant and interviewer present. Ethical approval was granted by the University College London Research Ethics Committee, reference 5234/001.

### Data collection

Socio-demographic questions covered age, sex and ethnic group. The pre-interview questionnaire also asked participants to report their height and weight, which were used to calculate their body mass index (BMI; weight in kg divided by the square of height in metres). Participants who attended the interview in

1  
2  
3 person were offered use of scales at the university to complete or verify their self-reported data, but this  
4 was not a requirement for participation.  
5

6  
7 Semi-structured interviews were carried out by a female researcher (LH; BSc Psychology), an MSc Health  
8 Psychology student who had completed qualitative training as part of her BSc and MSc. The interviewer had  
9 no previous relationship with the study participants. Participants were aware that the study was part of the  
10 interviewer's research degree. Interviews lasted approximately one hour, and were recorded and  
11 transcribed verbatim. A topic guide (**Table 1**) was developed collaboratively by all authors to guide the  
12 interviews and comprised a series of open questions covering experiences of weight management and  
13 motivators and barriers for weight loss, with a focus on any changes that have occurred with ageing, as well  
14 as views on the appropriateness of weight management for older people. The interviewer was trained to  
15 have minimal verbal input and prompt only when appropriate [44].  
16  
17  
18  
19  
20  
21  
22

### 23 **Patient and Public Involvement**

24  
25 Patients were not involved in the development of the research questions or choice of study design. The  
26 topic guide was piloted with two lay individuals for acceptability and comprehension, and to provide an  
27 indication of the time required to participate.  
28  
29  
30

31  
32 [Table 1 about here]  
33  
34

### 35 **Analysis**

36  
37 Data were analysed using thematic analysis, a qualitative method for identifying, analysing and reporting  
38 themes [45]. This method was chosen with the aim of providing a rich description of the data, and to  
39 identify themes at an explicit level using a realist approach [45]. As data were acquired, SEJ read the  
40 transcripts for essential familiarisation and to generate initial codes. These were amended and refined  
41 through discussion between the researchers in an iterative process until a final coding list was agreed. SEJ  
42 coded all the transcripts according to the established coding structure in NVivo V.10 and a random selection  
43 of transcripts (n=2) were coded by a second researcher (RJB) to check for reliability. Inter-rater reliability for  
44 the coding was generally high (81-100% agreement; mean 98%) with any minor differences resolved by  
45 discussion. SEJ and RJB collated codes into common themes, which were reviewed and refined, named and  
46 each given a written description. All themes were checked against the transcripts to ensure that they  
47 reflected the majority of participants. Individual experiences were also highlighted. The completed  
48  
49  
50  
51  
52  
53  
54  
55  
56  
57  
58  
59  
60

consolidated criteria for reporting qualitative research checklist is available in online supplementary material 1 [46].

## Results

### Participants

Fifteen interviews were conducted with 12 women and 3 men, aged between 67 and 84 years (**Table 2**); 11 face-to-face at the university and 4 by telephone. After the target number of 15 interviews was completed, the authors discussed the themes emerging and agreed that saturation had been reached [47]. Participants were on average 71.1 years old and the majority (73%) described their ethnicity as White British. While all reported having tried to manage their weight in the last five years, at the time of interview 33% had a BMI in the obese range ( $\geq 30$  kg/m<sup>2</sup>), a further 53% were overweight (BMI 25-29.9 kg/m<sup>2</sup>), and the remaining 13% had a BMI at the upper end of the normal weight range (18.5-24.9 kg/m<sup>2</sup>).

[Table 2 about here]

### Themes

Six themes emerged from the data: (1) mixed views on the importance of weight at older ages, (2) excess weight is more acceptable at older than younger ages, (3) excess weight has a negative impact on health and wellbeing, (4) appearance and health are important motivators for weight loss, (5) losing weight gets harder as you get older, and (6) limited guidance on weight management from health professionals. On the whole, there were no notable differences in responses by age, sex or weight status, so results are presented for the whole sample.

#### ***Mixed views on the importance of weight at older ages***

Participants spoke about the current importance of weight to them relative to when they were younger. Most participants felt weight control was just as important at older ages: "Just because I'm old [it] doesn't mean that I have to be fat ... It's very important to me, weight. It hasn't lost any importance at all" (106, female, 71 years, BMI 24.2) and "Once you know you're overweight and you feel a certain way you never lose sight of that" (110, female, 71 years, BMI 40.4) and "I don't think you ever get rid of that psychological

1  
2  
3 fear of fat, or at least I don't know anyone who suddenly said it doesn't matter" (113, female, 71 years, BMI  
4 35.7).

5  
6  
7 For some participants, the issue of weight control had become more relevant with age. A few people spoke  
8 about how they had gained weight gradually over the life course: "When I look at my life, in terms of weight  
9 I was probably nine and a half stone until I was in my thirties and had my children. Then it went up to  
10 probably ten stone. And then in my fifties bordering on eleven stone. And then in my sixties eleven and a  
11 half stone" (102, female, 68 years, BMI 27.0) and "As years progress, you put two pounds on there, a pound  
12 here, another stone, another stone. And I'm the biggest I've been now" (103, female, 69 years, BMI 26.1).  
13 Some reported having gained weight as they got older due to changes in lifestyle: "I used to do a lot of  
14 exercise. As I got older, I stopped doing so much so I got fatter" (105, male, 72 years, BMI 28.9). Others  
15 attributed age-related weight gain to specific health problems or medication use: "For most of my life I've  
16 been a reasonable weight. ... I had hip problems when I reached about 60 and had to have a hip  
17 replacement, and I put on a lot of weight before [the operation] because obviously I could not move as fast"  
18 (101, female, 67 years, BMI 28.2) and "I've always been aware of what I eat but it doesn't seem to matter; I  
19 keep gaining and gaining and then having to really hold it back. And I think also now, that I am on  
20 medication – that that has a role to play in it as well" (110, female, 71 years, BMI 40.4).

21  
22 However, several participants reported feeling less motivated to lose weight now that they were older: "I  
23 think when you're young, the motivation is there. You want to get the latest fashion, and you want to look  
24 stunning. And you want to find a mate. When you're older you get your old mate and the motivation is  
25 gone" (102, female, 68 years, BMI 27.0). A couple questioned whether trying to lose weight at older ages  
26 was worth the effort: "It can be done it's just you get quite lazy as you grow older. You think, 'Oh, is it worth  
27 it?'" (103, female, 69 years, BMI 26.1) and "Sometimes you think, 'Oh well, what is the point?'" (115,  
28 female, 60 years, BMI 33.9) and "My sister, she struggles with weight although she is quite slim ... and on  
29 the phone this morning she said, 'Since my party I haven't been able to lose weight, I'm putting it on again'.  
30 And then she said, 'But at our age really, do we care at 80 and 71?' And when I think of it like that, I think,  
31 'Well do I? Do I really care?' And then the next part of me says, 'Yes, you do'" (106, female, 71 years, BMI  
32 24.2).

33  
34 Participants generally felt that people shouldn't be concerned about age when it comes to losing weight: "I  
35 don't think you should start thinking like that, because as soon as you start thinking 'I can't do this because  
36 I'm...' whatever, you start limiting yourself. And why should you? ... So you take no notice when people sort  
37  
38  
39  
40  
41  
42  
43  
44  
45  
46  
47  
48  
49  
50  
51  
52  
53  
54  
55  
56  
57  
58  
59  
60

1  
2  
3 of, when my children say 'You can't do that!' because I can!" (101, female, age 67, BMI 28.2). However,  
4 many mentioned taking a more laid back approach to weight loss: "The older I got the, the more sensible I  
5 got I think. So I could do with being a stone lighter but, you know, I'm not desperate about it" (113, female,  
6 71 years, BMI 35.7) and "You have to recognise your limitations as you get older. I'm not doing too badly  
7 really" (111, male, 84 years, BMI 27.0). Participants also reported setting less ambitious weight loss goals:  
8 "As far as I'm concerned, the best is that I have a moderate amount of weight loss that suits me until I get to  
9 a point where I think I look ok, and then I'll stop and I don't go much further" (101, female, age 67, BMI  
10 28.2) and "You've always got to look nice, but certainly when you're my age, over 70, I don't think you  
11 should try to be slim. I don't think it's healthy" (107, female, 78 years, BMI 28.0).

12  
13  
14  
15  
16  
17  
18  
19 While most participants endorsed benefits of losing weight, one talked about the importance of maintaining  
20 body weight in order to have reserves in the event of illness: "I firmly believe that there is nothing wrong  
21 with older people being a bit fat-ish ... to be honest I think do we not, as we get older, need to be a little  
22 more rounded?" (107, female, 78 years, BMI 28.0); but only to a certain point: "I think if you're say 18 or 20  
23 stone or something like that when you're 60, it's time to say get yourself a gastric band because it's  
24 dangerous" (107, female, 78 years, BMI 28.0).

### 30 ***Excess weight is more acceptable at older than younger ages***

31  
32  
33 Although participants generally considered weight to be an important issue, many reported feeling less  
34 social pressure to lose weight compared with when they were younger: "There's no pressure at this point; I  
35 don't really feel I'm pressured to hurry up and get rid of another stone. I think I will eventually" (113,  
36 female, 71 years, BMI 35.7) and "I think if you're older you [lose weight] for yourself, you don't do it to  
37 satisfy people around you, to be liked more. You just do it because you want to lose weight. ... You do it  
38 because you feel you should do it, and for your own benefit, that's all" (103, female, 69 years, BMI 26.1) and  
39 "You've got to do it yourself because it is something that you want; it's for you and you're not doing it for  
40 anybody else" (109, female, 72 years, BMI 26.4).

41  
42  
43  
44  
45  
46  
47  
48  
49  
50  
51  
52  
53  
54  
55  
56  
57  
58  
59  
60  
Several people talked about how their family and friends had tried to discourage them from worrying about  
their weight and raised concerns about weight loss: "My daughter, who is wonderful in every and each way,  
says, 'Mum, just buy it, enjoy wearing it, you would look lovely – don't worry about your weight!'" (102,  
female, 68 years, BMI 27.0), "I have thinner friends who say, 'Just forget about it, you're alright', and I say, 'I  
can't!'" (110, female, 71 years, BMI 40.4) and "If you lose weight then they say, 'You don't look too good',  
'He's looking very pale', and all of that" (105, male, 72 years, BMI 28.9).

1  
2  
3 Participants spoke about there being less stigma around overweight at older ages: “I think a lot of people  
4 joke about it and say, ‘Oh, it’s middle age spread,’ so they accept having more weight. I think there is less  
5 stigma than at a younger age” (110, female, 71 years, BMI 40.4) and “[There’s] much less [stigma] because  
6 we become invisible. Nobody notices older people, or we all look alike or something. I mean I’m not exactly  
7 small and I’ve been walked into by people who just didn’t see me. You become invisible, so nobody’s going  
8 ‘urgh’; you’re just another old person with white hair and that’s that” (113, female, 71 years, BMI 35.7).  
9

### 14 ***Excess weight has a negative impact on health and wellbeing***

16  
17 Participants talked about the physical health consequences of excess weight: “The extra weight affects my  
18 sleep, my breathing is more affected, my joints are more affected” (110, female, 71 years, BMI 40.4) and “I  
19 do get tired easily, and I think that’s probably because I’m carrying more weight” (111, male, 84 years, BMI  
20 27.0). However, more so, the focus was on the impact of weight on mental wellbeing. Several people talked  
21 about feeling depressed about their weight: “It is pretty depressing looking at yourself in the mirror and  
22 thinking ‘Oh God, look at that!’ ... it’s mental as well as physical” (103, female, 69 years, BMI 26.1) and “I  
23 tried some things on this morning and I actually looked at myself and cried. I do get depressed with my  
24 weight; I don’t like it, and I berate myself quite a bit as well. ... I talk to myself going up and down the flat:  
25 ‘Oh you fat cow, for god’s sake have a bit of control!’” (106, female, 71 years, BMI 24.2). Some mentioned  
26 negative effects on self-esteem: “I try hard not to be negative about my body, but if I’m honest I am. I don’t  
27 feel as confident with it, it affects my self-esteem” (110, female, 71 years, BMI 40.4) and feelings of self-  
28 blame: “I get annoyed with myself because I know it’s my own fault that I’m putting on weight, that I’m not  
29 losing it” (105, male, 72 years, BMI 28.9).  
30  
31  
32  
33  
34  
35  
36  
37  
38  
39

40 Participants generally felt that losing weight would help to improve their health and wellbeing: “I don’t look  
41 huge... but oh, I’d love to be a size 14 again, and just be happy in my own skin” (102, female, 68 years, BMI  
42 27.0). Those who had successfully lost weight reflected on how it had improved their physical functioning: “I  
43 feel stronger with my weight down” (112, female, 70 years, BMI 23.3) and “I’ve lost a lot and I do feel better  
44 about it. See I can get up now, I can bend down like I couldn’t before, too – I couldn’t even see my  
45 shoelaces. ... You just feel so much better because you can do things” (109, female, 72 years, BMI 26.4).  
46 Psychological benefits were also mentioned: “I think [losing weight] made me feel better about myself. It’s  
47 confidence, it’s a nice place to be. You think, ‘Alright, I don’t look too bad.’ ... [It] puts you in a nice frame of  
48 mind” (104, female, 74 years, BMI 28.0) and “I feel better, lighter – more, how can I explain? Full of life”  
49 (103, female, age 69, BMI 26.1).  
50  
51  
52  
53  
54  
55  
56  
57  
58  
59  
60

### ***Appearance is an important motivator for weight loss***

Participants talked about appearance as one of the primary reasons for wanting to manage their weight. For many, appearance was a powerful motivator: “Vanity stays with you all your life if you’ve always been a bit attractive. I like to keep it that way ... obviously it’s gone, it’s going, but I don’t want to look a mess for my sake, for my children’s sake if they see me” (107, female, 78 years, BMI 28.0) and “I’d like to look good. I’d like to look how I think I look, and I think I look 6 foot 2, broad shoulders, narrow waist, hips and all of that. When I look in the mirror I know I don’t” (105, male, 72 years, BMI 28.9) and “I know it sounds stupid, but [health] takes second place to appearance. It shouldn’t do, but it does” (106, female, 71 years, BMI 24.2).

However, not everyone was concerned about losing weight for appearance reasons: “I’m quite confident. I see other people wearing beautiful clothes and would love to get into them, but it doesn’t worry me that I can’t really. ... It’s sort of not a major issue for me” (102, female, age 68, BMI 27.0).

### ***Health is an important motivator for weight loss***

The majority of participants cited health as a key driver for weight loss and spoke about health concerns becoming increasingly important as they had got older: “I suppose it started in my fifties. I noticed that I could not control [my weight] very easily. And then in the last 6-7 years when I’ve been diagnosed with a lung problem” (110, female, 71 years, BMI 40.4) and “I think it’s more dangerous [to be overweight] when you’re older, because of stroke and heart attacks and things like that” (109, female, 72 years, BMI 26.4). For a few, appearance had taken a backseat to health as they had got older: “I don’t care so much [about appearance] now, it’s more the health side of it. When you get older, you don’t care a damn what people think of you; not like when you’re younger” (114, female, 70 years, BMI 36.5) and “Fat’s no longer a fashion issue, but it’s become more of a health issue” (113, female, 71 years, BMI 35.7).

Several participants spoke of specific health conditions that they felt could be improved by losing weight: “I have breathing problems and so any extra weight makes breathing more difficult” (110, female, 71 years, BMI 40.4) and “I’ve got a dodgy heart and I’ve got terrible arthritis. I’ve got a bad back, I’ve got bad knees and everything else. And you know for years the doctors have been saying to me: lose weight, it will be better ... And before I lost three and a half stone I was borderline diabetic, so of course that was another factor that made me lose weight” (106, female, 71 years, BMI 24.2). One participant mentioned that weight loss could reduce the need to take medication to control weight-related health issues: “My blood pressure is borderline high and I know that if I get rid of that extra stone it [will] probably come down into

1  
2  
3 comfortable normal without any medication” (113, female, 71 years, BMI 35.7). Another spoke of fear of  
4 adverse consequences of weight-related health conditions: “I gained a lot of weight up to two to three years  
5 ago. I was about 19 stone and I thought, ‘This can’t go on.’ And because I’m diabetic, I thought, ‘I’ve got to  
6 lose weight, I don’t want to have my legs chopped off. I don’t want to go blind. I’ve got to do something  
7 about this,’ and I’ve lost about two and a half, three stone” (114, female, 70 years, BMI 36.5).

### 12 ***Losing weight gets harder as you get older***

15 Participants spoke unanimously about finding it more difficult to manage their weight as they got older: “It’s  
16 hard to lose weight when you get older, it’s much harder. You can lose seven pounds in a week years ago  
17 just like that, but once you get to a certain age it’s a lot harder” (114, female, 70 years, BMI 36.5) and  
18 “When you’re older it doesn’t come off quite as quickly” (113, female, 71 years, BMI 35.7) and “[It] appears  
19 to me, having looked at all my contemporaries, you do put on weight more easily [as you get older]. But  
20 what’s more interesting, which I didn’t expect to find – because no-one expects ageing to be interesting, but  
21 it actually is – is that you put on weight in different places” (101, female, age 67, BMI 28.2).

27 Multi-dimensional barriers to managing weight effectively at older ages were reported:

#### 30 ***Health-related barriers***

33 The ageing process was reported to negatively influence ability to lose weight. A general ‘slowing down’  
34 with age was commonly mentioned: “I think it has to do with lifestyle, ‘cause obviously you slow down –  
35 you know, it would be very abnormal if you didn’t – and so I don’t move as quick. If I clean a room in the  
36 house it used to take me half an hour, now it takes me an hour and a half” (104, female, 74 years, BMI 28.0)  
37 and “See a young person could get up in the morning and run around or could do many more things. But  
38 when you’re old, you go home, you get tired” (109, female, 72 years, BMI 26.4).

44 In addition to an impact on lifestyle, some participants speculated that this slowing down process might also  
45 have an effect on metabolism: “It may be something to do with our makeup as we get older and  
46 metabolism slows down I would imagine; everything else slows down” (104, female, 74 years, BMI 28.0) and  
47 “I don’t know whether your metabolism just doesn’t function as well as it did. So it’s probably just a factor  
48 of ageing and organs that nothing works as efficiently as it did 50 years ago” (113, female, 71 years, BMI  
49 35.7) and “It’s just a way of... how you digest your food I expect. I don’t know” (103, female, age 69, BMI  
50 26.1).

1  
2  
3 While health was a commonly reported motive for weight loss, specific problems with health and mobility  
4 were also mentioned as barriers to weight loss at older ages: “For an older person it’s very hard for them to  
5 lose weight because they can’t get about like a young person anymore. And they do tend to put more  
6 weight on ... you’re not going to burn off the calories because you can’t get about” (109, female, 72 years,  
7 BMI 26.4) and “I’m not as mobile as I was. I started doing tai chi and pilates but it’s not really exercise as  
8 such; I can’t do that because of my hips. That’s [got] a lot to do with my weight – I mean, I do use it as an  
9 excuse as well – but it is not just an excuse” (106, female, 71 years, BMI 24.2). Medication use was also  
10 thought to make it more difficult to lose weight: “Huge amounts of older people are very isolated, and  
11 they’re depressed and taking anti-depressants which are putting on the weight. It doesn’t help to take off  
12 weight, depression” (110, female, 71 years, BMI 40.4).  
13  
14  
15  
16  
17  
18  
19  
20

### 21 *Emotional barriers*

22  
23 A commonly cited barrier to weight loss was a lack of willpower: “I’ve got the motivation, I just haven’t got  
24 the will. I think it’s my willpower” (105, male, 72 years, BMI 28.9) and “It is very difficult, staying motivated  
25 – the hardest thing” (110, female, 71 years, BMI 40.4). For some, an awareness of their own mortality and  
26 wanting to enjoy life made it hard to sustain their resolve to lose weight: “I’ve lost that steely determination  
27 that I did have at one stage, you know: ‘I’m going to do it’. ... Now I think, ‘Oh yes, I’m going to lose half a  
28 stone’ and then we’re invited to lunch and I think, ‘Oh, stop it!’, you know, friends of mine are dying so why  
29 should I give up [eating out]?” (102, female, age 68, BMI 27.0) and “I know it sounds depressing – I’m  
30 enjoying my life, I’m very happy at the moment – but there’s no future in being old. Let’s face it, you have to  
31 be realistic here, so you get to the stage where [you think], ‘Well, if I can’t enjoy going out for a drink at  
32 night, enjoying the food I like, what is there in life?’” (107, female, 78 years, BMI 28.0).  
33  
34  
35  
36  
37  
38  
39  
40

41 A few participants mentioned comfort eating and using food to deal with loneliness: “I don’t know whether  
42 there is a little bit of comfort eating coming in maybe. I need something when my son and his grandchildren  
43 and his family are abroad; it just makes me a bit sad. And I’m not as active as I was before and that probably  
44 makes me a bit sad. So I think there is an element of comfort eating” (102, female, age 68, BMI 27.0) and  
45 “Old age is very lonely, so you have lots of time. ... Generally I’ll only be out of my house three hours and  
46 that’s a lot for old people ... so you’ve got the rest of the 21 hours of the day left” (107, female, 78 years,  
47 BMI 28.0).  
48  
49  
50  
51  
52

### 53 *Situational barriers*

1  
2  
3 Other reported barriers to effective weight management predominantly related to retirement and the  
4 impact it had on free time, physical activity and disposable income. Some participants commented that  
5 retiring left them more time for food-focused social occasions: "Now I'm retired and at home, we have a  
6 very active life. I don't mean active in exercise terms, but we've got lots of friends and our pleasure – I  
7 suppose one of the pleasures – is that you go out to nice places to eat and entertain, and everything is food-  
8 focused" (102, female, 68 years, BMI 27.0). Having more free time was also cited as an opportunity to be  
9 more active: "Loads of people I'm older with are extremely active; even more so than people in their sort of  
10 middle years when they have children and don't have time to do things for themselves quite as much" (101,  
11 female, 67 years, BMI 28.2), but some commented that stopping work had made them more sedentary:  
12 "Because I am retired now I have more time to sit, which I have never had really; I worked all my life" (104,  
13 female, 74 years, BMI 28.0) and "I'm retired now so I'm not walking around all day. ... I have to think about  
14 being active" (110, female, 71 years, BMI 40.4). Some believed a decline in physical activity was a central  
15 factor in age-related weight gain: "I've had a weight problem all my life, but an awful lot of people who  
16 haven't suddenly find they've started gaining weight in their 50s, and that's essentially because of the  
17 inactivity. Men are really bad at this. Men go to work, then they retire, and then they sit. They probably  
18 don't eat much more but they do a whole lot less" (113, female, 71 years, BMI 35.7). Free bus passes  
19 provided to the over-60s were mentioned in the context of discouraging physical activity: "The Freedom  
20 pass is another thing of concern, which I shouldn't have because it tends to make me hop on a bus for a  
21 couple of stops instead of walking" (105, male, 72 years, BMI 28.9). Retirement also had an effect on  
22 disposable income available to fund weight loss efforts: "WeightWatchers is quite expensive; certainly when  
23 you're on a pension I find it's quite dear. When you're at work you don't think about it" (104, female, 74  
24 years, BMI 28.0).

25  
26  
27  
28  
29  
30  
31  
32  
33  
34  
35 While most explanations for weight loss becoming more difficult over time related to the ageing process,  
36 some participants attributed increasing difficulty in managing their weight to changes in the food  
37 environment: "I think one of the big changes is [that now] you are bombarded with food. When I was  
38 growing up, you'd never think of going to get a takeaway. Where I live, on the high street, at every corner is  
39 something, it's all fast food" (110, female, 71 years, BMI 40.4) and "I lived in a house where there wasn't  
40 actually a huge amount of food at some points when I was small, so not having enough to eat was relatively  
41 common" (101, female, 67 years, BMI 28.2). However, some commented that information on healthy living  
42 was more readily available than when they were younger: "There was no information at all on what made  
43 you fat; nobody said anything about it (110, female, 71 years, BMI 40.4) and "Everybody, absolutely  
44  
45  
46  
47  
48  
49  
50  
51  
52  
53  
54  
55  
56  
57  
58  
59  
60

1  
2  
3 everybody knows [what they should be eating]; I can't believe that anybody on the planet who doesn't  
4 know. The five a day message has certainly got around" (113, female, 71 years, BMI 35.7), and one  
5 participant mentioned that better availability of and access to healthy foods had made it easier to lose  
6 weight: "I think it's better now, because I'm eating better things. And when I was trying to lose weight  
7 before there wasn't the variety of food available" (112, female, 70 years, BMI 23.3).

### 12 *Weight loss strategies less effective than at younger ages*

15 In addition to these barriers, several participants commented that strategies for weight loss that they had  
16 used successfully when they were younger did not produce the same results at older ages: "When you're  
17 younger, the weight goes much quicker than when you're older. ... If I went a week eating the way I ate last  
18 week I would have lost half a stone, no problem. I lost a pound. It's much, much more difficult at this age to  
19 lose weight, it really is" (106, female, 71 years, BMI 24.2) and "I eat less than I used to and it doesn't seem  
20 to make much difference. ... You know, [at younger ages] when you said you would lose weight and you cut  
21 down on something, it showed. But I don't think it makes much difference when you grow older" (103,  
22 female, 69 years, BMI 26.1).

### 29 *Limited guidance on weight management from health professionals*

32 Participants discussed the role of health professionals in their weight management efforts, with mixed  
33 experience. Many felt it was important for health professionals to be involved with older people's weight  
34 management efforts: "I think the doctor's is the first stop for somebody if they're very overweight. You have  
35 to tell them point blank: 'You're just too heavy and you're going to suffer for it, you won't live very long like  
36 this'. You have to be cruel to be kind" (107, female, 78 years, BMI 28.0) and thought older people concerned  
37 about their weight should "Talk to your GP, find out if you need to lose weight, if so do it properly – either  
38 through a GP or a dietitian" (109, female, 72 years, BMI 26.4).

45 Some participants said their doctor had told them not to worry about being overweight: "My doctors years  
46 ago were saying to me, 'You're a little bit overweight, but it's regular [stable]. That's good; if you're 11 stone  
47 and two years later you're still at 11 stone that's a good sign'" (111, male, 84 years, BMI 27.0) and "When I  
48 went last time for my regular check up, [the GP] weighed me and said 'Oh, you're so many kilos, that's ok'. I  
49 thought 'you must be joking!' If you sort of double that, multiply that by 2.2 or whatever it is [to convert  
50 into pounds], that's a hell of a lot of weight! And she didn't seem bothered" (105, male, 72 years, BMI 28.9).

1  
2  
3 A number of participants had received guidance and support for weight management from a health  
4 professional. Most found it useful: "The doctor asked me, did I want to go for prescription exercise. I agreed  
5 to that. ... When I was out of breath, he told me it had got a lot to do with my weight – and that I was  
6 smoking – but it was to do with weight. Once I went there and I got into the programme and [my weight]  
7 started to come down I was fine" (109, female, 72 years, BMI 26.4) and "I went privately to somebody –  
8 we've got a small insurance thing – and, he did these tests and I had an ulcer. And my weight had gone up a  
9 lot, it appeared, at the time. And he just politely said, 'It would help if you lost weight.' He was just a very  
10 nice man, very gentle. So I lost quite a bit, and I managed to get it down" (112, female, 70 years, BMI 23.3).  
11 However, some reported a less positive experience: "I did go to see an NHS health coach for weight, but I  
12 found it really useless. ... It was so basic, I got bored with it. Or they give you reams of information to read  
13 but it doesn't actually stay" (110, female, 71 years, BMI 40.4).  
14  
15  
16  
17  
18  
19  
20  
21  
22

23 Some participants mentioned a total lack of advice from health professionals: "I have to go to the doctor  
24 every six months, blood tests and everything. ... They don't get on [at] me and I wonder why, because I  
25 know I'm really overweight, but they don't seem to make a lot of comment. They just say 'Oh you should  
26 cut out the biscuits', they don't say, 'Do this, do that.' It really surprises me" (105, male, 72 years, BMI 28.9)  
27 and "When you see somebody professional they just don't do anything about it. They could be a bit more  
28 helpful I think" (112, female, 70 years, BMI 23.3). Others reported simply having been 'told off' about their  
29 weight: "I get told off by the doctor for putting on weight: 'I think it should be a bit less than that,' she will  
30 say. She doesn't like me putting on too much weight" (111, male, 84 years, BMI 27.0) and "I had a stomach  
31 ulcer, and you get acidity in the back of your throat. So I did talk it over with the senior GP and she said, 'Oh  
32 well, if you're overweight then you lose it or you put up with it.' That was it" (112, female, 70 years, BMI  
33 23.3).  
34  
35  
36  
37  
38  
39  
40  
41

42 A number of participants questioned how much doctors could actually do to help: "Old people go straight to  
43 the doctor which is a bit sad really, because what can the doctor do? He would probably give you a diet  
44 sheet. But as soon as I'm told what to eat, I don't want to eat it" (107, female, 78 years, BMI 28.0). Others  
45 felt that advice from a doctor was (or would be) a powerful motivator: "[The GP] said about going back to  
46 the gym and that has spurred me on" (114, female, 70 years, BMI 36.5) and "You know, if someone at the  
47 doctors' had said, 'Do that,' it would have been done." (105, male, 72 years, BMI 28.9). Some participants  
48 highlighted the lack of clear information on weight loss at older ages: "There is a lack of information; I  
49 haven't seen anything that is targeting older people. They just say 'Eat less and move more.' I think it's  
50 important to have information about what to eat, and to have some supportive groups targeting the over-  
51  
52  
53  
54  
55  
56  
57  
58  
59  
60

1  
2  
3 60s" (110, female, 71 years, BMI 40.4) and "I don't know who I'd ask. The doctor's not interested. I could  
4 see somebody privately but it costs, and are they going to be any better really?" (112, female, 70 years, BMI  
5 23.3).  
6  
7  
8  
9  
10  
11

## 12 Discussion

13  
14  
15 The results of this qualitative study indicate that weight remains an issue of significant concern to many  
16 older people with recent experience of weight management, but is less important to others. Although  
17 participants felt it was more socially acceptable to have excess weight at older than younger ages, they  
18 reported substantial negative impacts on physical and psychological health associated with carrying excess  
19 weight that they felt could be alleviated by weight loss. Participants described how losing weight had  
20 become more difficult as they had got older, citing a range of barriers to effective weight management  
21 including age-related declines in health and mobility, emotional factors such as comfort eating and lack of  
22 willpower, changes in the food environment, and the impact of retirement on food intake and physical  
23 activity. While the majority indicated that they would appreciate support from a health professional in  
24 managing their weight, few reported having received useful advice in the past.  
25  
26  
27  
28  
29  
30  
31

32  
33 This study has a number of limitations. The sample size was small but comparable with other qualitative  
34 studies [42,43], and we believe data were saturated as no new themes emerged from the last interviews. It  
35 is likely that saturation was achieved with a relatively small sample size as a result of the homogeneous  
36 nature of the sample. The generally positive attitudes towards weight management may be explained by  
37 self-selection bias. Those interested in our study may be those with a long-term interest in weight control,  
38 or those who have become interested as they have got older. In order to collect data on experiences as well  
39 as attitudes, we restricted our sample to people with recent experience of weight management. Excluding  
40 individuals who have not attempted to control their weight in the last five years may mean our results  
41 overlook the views of those who feel weight management is inappropriate at older ages. Future research  
42 should seek to explore this in more depth. Information on weight status was captured using a crude  
43 measure of BMI, which has been criticised for being an inadequate measure of obesity, particularly among  
44 older people who tend to have less muscle mass [48]. We did not ask participants about the presence of  
45 comorbid health problems, which may increase their motivation to lose weight for health reasons, or their  
46 social networks, which may influence the extent to which they feel social pressure to lose weight or engage  
47  
48  
49  
50  
51  
52  
53  
54  
55  
56  
57  
58  
59  
60

1  
2  
3 in leisure activities. All participants were white, so our findings do not reflect the views of other ethnic  
4 groups in which attitudes towards weight and ageing may differ. We lacked sufficient numbers for subgroup  
5 comparisons. Future work could explore the extent to which our findings differ according to age (within the  
6 older age range), sex, and extent of overweight. In addition, we did not assess socioeconomic status,  
7 limiting insight into differences into attitudes towards weight loss across the social gradient. Given that our  
8 findings indicated that affordability, leisure time and consumer culture were all important factors, it is likely  
9 that people's experiences of managing their weight would vary according to their socioeconomic position.  
10 To be inclusive of individuals who were unable to travel to the university, this study used a combination of  
11 face-to-face and telephone interviews. However, mixing such methods can also be viewed as a limitation as  
12 telephone interviews tend to be shorter than those conducted in person, and typically see interviewees and  
13 interviewers speak for less and greater time respectively [49]. This may result in telephone data lacking the  
14 same breadth of coverage and depth of detail that can be achieved face-to-face.  
15  
16  
17  
18  
19  
20  
21  
22  
23

24 Our participants generally reported feeling less social pressure to lose weight than they had when they were  
25 younger. Previous research has shown that older women may be less influenced by, and feel less pressure  
26 to attain, the media's portrayal of cultural ideals for beauty and thinness [50,51], and tend to endorse a  
27 more curvaceous body shape ideal than their younger counterparts [52]. Some commented that they  
28 perceived obesity among older adults to be less stigmatised, consistent with surveys from the UK and USA  
29 showing an age-related decline in reports of weight-related discrimination [53,54]. While these observations  
30 might lead to the assumption that older adults are less concerned about managing their weight than  
31 younger people, this did not appear to be true for our participants. Appearance remained a leading  
32 motivator for weight loss for many participants, and an important consideration for others who cited health  
33 as their primary concern. This is concordant with the existing literature which indicates that older people  
34 still care about their appearance [37,39]. Body dissatisfaction is evident in midlife [33–36] and may even  
35 increase as older people gain weight and the discrepancy between their ideal and actual body image widens  
36 [38].  
37  
38  
39  
40  
41  
42  
43  
44  
45  
46

47 In addition to appearance, health reasons featured highly among our participants' reasons for wanting to  
48 lose weight, and for many had become increasingly important as they had got older. This is unsurprising,  
49 given that a host of health problems become increasingly prevalent with age [8]. For some participants, fear  
50 of developing chronic diseases such as diabetes or cancer or experiencing an acute event like a heart attack  
51 or stroke was driving their weight loss efforts. Seeing evidence of the adverse health consequences of  
52 carrying excess weight had prompted others to think more seriously about their weight, with many  
53  
54  
55  
56  
57  
58  
59  
60

1  
2  
3 reporting a desire to alleviate the side effects of existing health problems and reduce the need for  
4 medication.  
5

6  
7 Our participants believed that losing weight could lead to substantial improvements in psychological and  
8 physical health. No concerns about potential adverse health consequences of weight loss were raised,  
9 although one participant felt that some excess weight could be protective in the event of illness. However,  
10 without exception, it was reported that weight management gets increasingly difficult with age. The same  
11 was previously reported in a qualitative study exploring older women's perceptions of ideal body weights  
12 [55]. In our study, many participants described how weight loss strategies they had used successfully when  
13 they were younger no longer yielded the same results. Health problems and loss of stamina and mobility  
14 were commonly cited as barriers to effective weight management, as were a host of factors linked to  
15 retirement. For the majority, retiring had reduced the need to be physically active and increased time  
16 available for food-focused social occasions and sedentary activities, making it more difficult to achieve  
17 energy balance. Previous studies using cohort data have observed similar, showing that retirement is  
18 associated with a loss of work-related physical activity that is not fully compensated for by leisure-time  
19 physical activity [56,57], increased time spent watching television [58,59], and increases in body weight and  
20 waist circumference in people retiring from active jobs [60,61]. A reduction in income after retirement was  
21 also highlighted as a barrier to weight management. Concerns about affordability are commonly reported  
22 by those of low socioeconomic status who want to lose weight [62]. By placing additional financial burden  
23 on many older people, retirement may reduce their ability to achieve lifestyles pursuant to healthy ageing  
24 and exacerbate health inequalities attributable to overweight and obesity. Loneliness was also mentioned  
25 as a barrier to weight loss, with some people using food as a source of comfort. Loneliness increases with  
26 age [63] and is a common cause of emotional eating, a highly prevalent behaviour among people affected  
27 by obesity [64].  
28  
29  
30  
31  
32  
33  
34  
35  
36  
37  
38  
39  
40  
41  
42  
43

44 Health professionals were viewed to have an important role to play in guiding and supporting older people's  
45 weight management efforts, but participants' experiences with seeking and receiving professional help  
46 were varied. While some had received support for weight management from a GP or other health  
47 professional, others reported receiving no advice at all – even when they had sought it out – or a “telling  
48 off” about their weight with no guidance as to how to address the issue. Previous research has found that  
49 health professionals experience numerous barriers to providing weight loss advice, including perceived lack  
50 of time, training, knowledge and confidence [65–71]. In addition, GPs tend to underestimate BMI and  
51 weight status, which makes them less likely to intervene and discuss weight [72]. Consistent with evidence  
52  
53  
54  
55  
56  
57  
58  
59  
60

1  
2  
3 that weight loss advice from a health professional in primary care is associated weight loss attempts [40,73],  
4 our participants felt that health professional advice would be a powerful motivator and the majority said  
5 they would welcome such advice. However, it is important to note that these findings only reflect the views  
6 of older people who have tried to manage their weight, and may not extend to those less concerned about  
7 their weight. It is possible that being given unsolicited advice to lose weight may have a negative impact on  
8 overall wellbeing, with people feeling stigmatised, embarrassed, and therefore avoiding accessing health  
9 services in future [74].  
10  
11  
12  
13  
14  
15

16 Nonetheless, while health professionals may be reluctant to encourage weight loss in older patients due to  
17 concerns about associated risks (e.g. loss of muscle mass and bone density) [24,25], reviews of the literature  
18 indicate that weight loss can have significant benefits for physical function and metabolic and cardiovascular  
19 risk [31] and that, on balance, weight loss appears advisable [32]. Our findings indicate that weight  
20 management is an issue of considerable relevance and importance to many older people, and one for which  
21 they would like to receive advice and support. There is therefore a need for further research to identify  
22 ways in which health professionals can best support older patients who want to do so to address weight  
23 issues while minimising risk to health.  
24  
25  
26  
27  
28  
29

30 In conclusion, our findings indicate that while many older adults with recent experience of weight  
31 management consider weight to be an important issue which has a significant impact on physical and  
32 mental health, others are less concerned about losing weight than they were when they were younger.  
33 Weight loss is desired in order to improve appearance and, increasingly importantly, health, but a range of  
34 barriers and limited support from health professionals make it harder to lose weight successfully at older  
35 ages. Health professionals should be encouraged to broach the issue of weight management with older  
36 patients and offer guidance and support to those who want it. The development of materials – for both  
37 health professionals and older adults – providing information on losing weight safely at older ages and ways  
38 of managing issues relating to retirement and declining health and mobility could help address the unmet  
39 needs of older people who want help to manage their weight.  
40  
41  
42  
43  
44  
45  
46  
47  
48  
49  
50  
51  
52  
53  
54  
55  
56  
57  
58  
59  
60

## **Funding statement**

This work was supported by a research grant from the Cancer Research UK (ref no. C1418/A14133). RJB is supported by Yorkshire Cancer Research University Academic Fellowship Funding.

## **Competing interests**

None.

## **Contributors**

Everyone listed as an author fulfils all three of the ICMJE guidelines for authorship: (1) substantial contributions to the conception and design, acquisition of data, or analysis and interpretation of data; (2) drafting of the article or revising it critically for important intellectual content; and (3) final approval of the version to be published. SEJ and RJB were responsible for the study concept and design. LH acquired the data. SEJ, LH and RJB analysed and interpreted the data. SEJ drafted the manuscript, and all authors revised it for important intellectual content. All the authors had final approval of the version to be published.

## **Data sharing statement**

Anonymised interview transcripts can be obtained by the corresponding author on reasonable request.

## References

- 1 National Center for Health Statistics. *Health, United States, 2007: With Chartbook on Trends in the Health of Americans*. Hyattsville, MD: 2007.
- 2 Office for National Statistics. Population Ageing in the United Kingdom, its Constituent Countries and the European Union. Off. Natl. Stat. 2012.<http://www.ons.gov.uk/ons/rel/mortality-ageing/focus-on-older-people/population-ageing-in-the-united-kingdom-and-europe/rpt-age-uk-eu.html#tab-Associated-links> (accessed 14 Nov 2012).
- 3 Fakhouri TH, Ogden CL, Carroll MD. *Prevalence of obesity among older adults in the United States, 2007-2010. NCHS data brief, no 106*. Hyattsville, MD: : National Center for Health Statistics 2012. <http://www.cdc.gov/nchs/data/databriefs/db106.htm#ref1> (accessed 14 Nov 2012).
- 4 Health & Social Care Information Centre. Health Survey for England - 2010: Trend tables. 2010.<http://www.hscic.gov.uk/pubs/hse10trends> (accessed 21 Jul 2014).
- 5 Flegal KM, Carroll MD, Kit BK, *et al*. Prevalence of Obesity and Trends in the Distribution of Body Mass Index Among US Adults, 1999-2010. *JAMA J Am Med Assoc* 2012;**307**:491–7. doi:10.1001/jama.2012.39
- 6 Wang YC, McPherson K, Marsh T, *et al*. Health and economic burden of the projected obesity trends in the USA and the UK. *The Lancet* 2011;**378**:815–25. doi:10.1016/S0140-6736(11)60814-3
- 7 Vincent GK, Velkoff VA. *The next four decades: the older population in the United States: 2010 to 2050*. US Department of Commerce, Economics and Statistics Administration, US Census Bureau 2010.
- 8 World Health Organization. Global health and ageing. WHO. 2011.[http://www.who.int/ageing/publications/global\\_health/en/](http://www.who.int/ageing/publications/global_health/en/) (accessed 31 Mar 2017).
- 9 Centers for Disease Control and Prevention. *Healthy Aging: Preventing Disease and Improving Quality of Life Among Older Americans 2003*. Department of Health and Human Services 2003. <http://www.cdc.gov/chronicdisease/resources/publications/aag/aging.htm> (accessed 14 Nov 2012).
- 10 Davison KK, Ford ES, Cogswell ME, *et al*. Percentage of Body Fat and Body Mass Index Are Associated with Mobility Limitations in People Aged 70 and Older from NHANES III. *J Am Geriatr Soc* 2002;**50**:1802–1809. doi:10.1046/j.1532-5415.2002.50508.x
- 11 Jensen GL, Friedmann JM. Obesity Is Associated with Functional Decline in Community-Dwelling Rural Older Persons. *J Am Geriatr Soc* 2002;**50**:918–923. doi:10.1046/j.1532-5415.2002.50220.x
- 12 Launer LJ, Harris T, Rumpel C, *et al*. Body mass index, weight change, and risk of mobility disability in middle-aged and older women. The epidemiologic follow-up study of NHANES I. *JAMA J Am Med Assoc* 1994;**271**:1093–8.
- 13 Visser M, Langlois J, Guralnik JM, *et al*. High body fatness, but not low fat-free mass, predicts disability in older men and women: the Cardiovascular Health Study. *Am J Clin Nutr* 1998;**68**:584–90.
- 14 Wanless D. Securing good health for the whole population. *Lond HM Treas* 2004;**4**:2003–2004.

- 1  
2  
3 15 Armamento-Villareal R, Sadler C, Napoli N, *et al.* Weight loss in obese older adults increases serum  
4 sclerostin and impairs hip geometry but both are prevented by exercise training. *J Bone Miner Res*  
5 2012;**27**:1215–1221. doi:10.1002/jbmr.1560  
6  
7 16 Frimel TN, Sinacore DR, Villareal DT. Exercise Attenuates the Weight-Loss-Induced Reduction in Muscle  
8 Mass in Frail Obese Older Adults. *Med Sci Sports Exerc* 2008;**40**:1213–9.  
9 doi:10.1249/MSS.0b013e31816a85ce  
10  
11 17 Villareal DT, Chode S, Parimi N, *et al.* Weight Loss, Exercise, or Both and Physical Function in Obese  
12 Older Adults. *N Engl J Med* 2011;**364**:1218–29. doi:10.1056/NEJMoa1008234  
13  
14 18 Villareal DT, Banks M, Sinacore DR, *et al.* Effect of Weight Loss and Exercise on Frailty in Obese Older  
15 Adults. *Arch Intern Med* 2006;**166**:860–6. doi:10.1001/archinte.166.8.860  
16  
17 19 Villareal DT, Shah K, Banks MR, *et al.* Effect of Weight Loss and Exercise Therapy on Bone Metabolism  
18 and Mass in Obese Older Adults: A One-Year Randomized Controlled Trial. *J Clin Endocrinol Metab*  
19 2008;**93**:2181–7. doi:10.1210/jc.2007-1473  
20  
21 20 Bales CW, Buhr G. Is obesity bad for older persons? A systematic review of the pros and cons of weight  
22 reduction in later life. *J Am Med Dir Assoc* 2008;**9**:302–12. doi:10.1016/j.jamda.2008.01.006  
23  
24 21 Inelmen EM, Sergi G, Coin A, *et al.* Can obesity be a risk factor in elderly people? *Obes Rev Off J Int*  
25 *Assoc Study Obes* 2003;**4**:147–55.  
26  
27 22 Janssen I. Morbidity and Mortality Risk Associated With an Overweight BMI in Older Men and Women.  
28 *Obesity* 2007;**15**:1827–1840. doi:10.1038/oby.2007.217  
29  
30 23 Allison DB, Gallagher D, Heo M, *et al.* Body mass index and all-cause mortality among people age 70 and  
31 over: the Longitudinal Study of Aging. *Int J Obes Relat Metab Disord J Int Assoc Study Obes*  
32 1997;**21**:424–31.  
33  
34 24 Houston DK, Nicklas BJ, Zizza CA. Weighty Concerns: The Growing Prevalence of Obesity among Older  
35 Adults. *J Am Diet Assoc* 2009;**109**:1886–95. doi:10.1016/j.jada.2009.08.014  
36  
37 25 Sommers A. U.S. Congressional Research Service: obesity among older Americans.  
38 2011. [http://www.legistorm.com/score\\_crs/show/id/104646.html](http://www.legistorm.com/score_crs/show/id/104646.html) (accessed 18 Apr 2013).  
39  
40 26 French SA, Folsom AR, Jeffery RW, *et al.* Prospective study of intentionality of weight loss and mortality  
41 in older women: the Iowa Women’s Health study. *Am J Epidemiol* 1999;**149**:504–514.  
42  
43 27 Ingram DD, Mussolino ME. Weight loss from maximum body weight and mortality: the Third National  
44 Health and Nutrition Examination Survey Linked Mortality File. *Int J Obes* 2005 2010;**34**:1044–50.  
45 doi:10.1038/ijo.2010.41  
46  
47 28 Villareal DT, Apovian CM, Kushner RF, *et al.* Obesity in older adults: technical review and position  
48 statement of the American Society for Nutrition and NAASO, The Obesity Society. *Am J Clin Nutr*  
49 2005;**82**:923–34.  
50  
51  
52  
53  
54  
55  
56  
57  
58  
59  
60

- 1  
2  
3 29 Shea MK, Houston DK, Nicklas BJ, *et al.* The effect of randomization to weight loss on total mortality in  
4 older overweight and obese adults: the ADAPT Study. *J Gerontol A Biol Sci Med Sci* 2010;**65**:519–25.  
5 doi:10.1093/gerona/glp217  
6
- 7 30 Wannamethee SG, Shaper AG, Lennon L. Reasons for intentional weight loss, unintentional weight loss,  
8 and mortality in older men. *Arch Intern Med* 2005;**165**:1035–40. doi:10.1001/archinte.165.9.1035  
9
- 10 31 Waters DL, Ward AL, Villareal DT. Weight loss in obese adults 65years and older: A review of the  
11 controversy. *Exp Gerontol* Published Online First: 9 February 2013. doi:10.1016/j.exger.2013.02.005  
12  
13
- 14 32 Felix HC, West DS. Effectiveness of weight loss interventions for obese older adults. *Am J Health Promot*  
15 *AJHP* 2013;**27**:191–9. doi:10.4278/ajhp.110617-LIT-259  
16
- 17 33 Tiggemann M. Body image across the adult life span: stability and change. *Body Image* 2004;**1**:29–41.  
18 doi:10.1016/S1740-1445(03)00002-0  
19
- 20 34 Webster J, Tiggemann M. The Relationship Between Women’s Body Satisfaction and Self-Image Across  
21 the Life Span: The Role of Cognitive Control. *J Genet Psychol* 2003;**164**:241–52.  
22 doi:10.1080/00221320309597980  
23
- 24 35 Lamb CS, Jackson LA, Cassiday PB, *et al.* Body figure preferences of men and women: A comparison of  
25 two generations. *Sex Roles* 1993;**28**:345–58. doi:10.1007/BF00289890  
26  
27
- 28 36 Rozin P, Fallon A. Body image, attitudes to weight, and misperceptions of figure preferences of the  
29 opposite sex: a comparison of men and women in two generations. *J Abnorm Psychol* 1988;**97**:342–5.  
30
- 31 37 Gosselink CA, Cox DL, McClure SJ, *et al.* Ravishing or ravaged: women’s relationships with women in the  
32 context of aging and Western beauty culture. *Int J Aging Hum Dev* 2008;**66**:307–27.  
33 doi:10.2190/AG.66.4.c  
34
- 35 38 Tiggemann M. Body-size dissatisfaction: Individual differences in age and gender, and relationship with  
36 self-esteem. *Personal Individ Differ* 1992;**13**:39–43. doi:10.1016/0191-8869(92)90215-B  
37  
38
- 39 39 Beeken RJ, Mahdi S, Johnson F, *et al.* Intentions to Prevent Weight Gain in Older and Younger Adults;  
40 The Importance of Perceived Health and Appearance Consequences. *Obes Facts* 2018;**11**:83–92.  
41 doi:10.1159/000486961  
42
- 43 40 Jackson SE, Wardle J, Johnson F, *et al.* The impact of a health professional recommendation on weight  
44 loss attempts in overweight and obese British adults: a cross-sectional analysis. *BMJ Open*  
45 2013;**3**:e003693. doi:10.1136/bmjopen-2013-003693  
46
- 47 41 Holliday D. Analysing qualitative data. In: *Continuum companion to research methods in applied*  
48 *linguistics*. Australia: : Continuum 2010. 98–110.  
49  
50
- 51 42 Winter Falk L, Bisogni CA, Sobal J. Food Choice Processes of Older Adults: A Qualitative Investigation. *J*  
52 *Nutr Educ* 1996;**28**:257–65. doi:10.1016/S0022-3182(96)70098-5  
53
- 54 43 Jancey JM, Clarke A, Howat P, *et al.* Perceptions of physical activity by older adults: A qualitative study.  
55 *Health Educ J* 2009;**68**:196–206. doi:10.1177/0017896909339531  
56  
57  
58  
59  
60

- 1  
2  
3 44 Oppenheim AN. *Questionnaire design, interviewing and attitude measurement*. Bloomsbury Publishing  
4 2000.  
5 [https://books.google.co.uk/books?hl=en&lr=&id=6V4GnZS7TO4C&oi=fnd&pg=PA5&dq=oppenheim+Qu](https://books.google.co.uk/books?hl=en&lr=&id=6V4GnZS7TO4C&oi=fnd&pg=PA5&dq=oppenheim+Questionnaire+design,+interviewing+and+attitude+measurement.&ots=sBK5bm_GbJ&sig=6MZvLwLSk0iaZRPqIOIZYISQ570)  
6 [estionnaire+design,+interviewing+and+attitude+measurement.&ots=sBK5bm\\_GbJ&sig=6MZvLwLSk0iaZ](https://books.google.co.uk/books?hl=en&lr=&id=6V4GnZS7TO4C&oi=fnd&pg=PA5&dq=oppenheim+Questionnaire+design,+interviewing+and+attitude+measurement.&ots=sBK5bm_GbJ&sig=6MZvLwLSk0iaZRPqIOIZYISQ570)  
7 [RPqIOIZYISQ570](https://books.google.co.uk/books?hl=en&lr=&id=6V4GnZS7TO4C&oi=fnd&pg=PA5&dq=oppenheim+Questionnaire+design,+interviewing+and+attitude+measurement.&ots=sBK5bm_GbJ&sig=6MZvLwLSk0iaZRPqIOIZYISQ570) (accessed 25 Jan 2017).  
8  
9  
10 45 Braun V, Clarke V. Using thematic analysis in psychology. *Qual Res Psychol* 2006;**3**:77–101.  
11 doi:10.1191/1478088706qp063oa  
12  
13 46 Tong A, Sainsbury P, Craig J. Consolidated criteria for reporting qualitative research (COREQ): a 32-item  
14 checklist for interviews and focus groups. *Int J Qual Health Care* 2007;**19**:349–57.  
15 doi:10.1093/intqhc/mzm042  
16  
17 47 Morse JM. Determining Sample Size. *Qual Health Res* 2000;**10**:3–5. doi:10.1177/104973200129118183  
18  
19 48 Batsis JA, Mackenzie TA, Bartels SJ, *et al*. Diagnostic Accuracy of Body Mass Index to Identify Obesity in  
20 Older Adults: NHANES 1999–2004. *Int J Obes* 2016;**40**:761–7. doi:10.1038/ijo.2015.243  
21  
22 49 Irvine A. Duration, Dominance and Depth in Telephone and Face-to-Face Interviews: A Comparative  
23 Exploration. *Int J Qual Methods* 2011;**10**:202–20. doi:10.1177/160940691101000302  
24  
25 50 Bedford JL, Johnson CS. Societal Influences on Body Image Dissatisfaction in Younger and Older Women.  
26 *J Women Aging* 2006;**18**:41–55. doi:10.1300/J074v18n01\_04  
27  
28 51 Dunkel TM, Davidson D, Qurashi S. Body satisfaction and pressure to be thin in younger and older  
29 Muslim and non-Muslim women: The role of Western and non-Western dress preferences. *Body Image*  
30 2010;**7**:56–65. doi:10.1016/j.bodyim.2009.10.003  
31  
32 52 Clarke LCH. Beauty in Later Life: Older Women’s Perceptions of Physical Attractiveness. *Can J Aging Rev*  
33 *Can Vieil* 2002;**21**:429–42. doi:10.1017/S0714980800001744  
34  
35 53 Puhl RM, Andreyeva T, Brownell KD. Perceptions of weight discrimination: prevalence and comparison  
36 to race and gender discrimination in America. *Int J Obes* 2008;**32**:992–1000. doi:10.1038/ijo.2008.22  
37  
38 54 Jackson SE, Steptoe A, Beeken RJ, *et al*. Perceived weight discrimination in England: a population-based  
39 study of adults aged  $\geq 50$  years. *Int J Obes* 2015;**39**:858–64. doi:10.1038/ijo.2014.186  
40  
41 55 Clarke LH. Older women’s perceptions of ideal body weights: the tensions between health and  
42 appearance motivations for weight loss. *Ageing Soc* 2002;**22**:751–773.  
43  
44 56 Slingerland AS, Lenthe FJ van, Jukema JW, *et al*. Aging, Retirement, and Changes in Physical Activity:  
45 Prospective Cohort Findings from the GLOBE Study. *Am J Epidemiol* 2007;**165**:1356–63.  
46 doi:10.1093/aje/kwm053  
47  
48 57 Berger U, Der G, Mutrie N, *et al*. The impact of retirement on physical activity. *Ageing Soc* 2005;**25**:181–  
49 195.  
50  
51  
52  
53  
54  
55  
56  
57  
58  
59  
60

- 1  
2  
3 58 Touvier M, Bertrais S, Charreire H, *et al.* Changes in leisure-time physical activity and sedentary  
4 behaviour at retirement: a prospective study in middle-aged French subjects. *Int J Behav Nutr Phys Act*  
5 2010;**7**:14.  
6  
7  
8 59 Evenson KR, Rosamond WD, Cai J, *et al.* Influence of Retirement on Leisure-time Physical ActivityThe  
9 Atherosclerosis Risk in Communities Study. *Am J Epidemiol* 2002;**155**:692–9. doi:10.1093/aje/155.8.692  
10  
11 60 Nooyens AC, Visscher TL, Schuit AJ, *et al.* Effects of retirement on lifestyle in relation to changes in  
12 weight and waist circumference in Dutch men: a prospective study. *Public Health Nutr* 2005;**8**:1266–74.  
13 doi:10.1079/PHN2005756  
14  
15 61 Zaninotto P, Jackson S, Jackowska M, *et al.* Trends in obesity among older people in England. In: *The*  
16 *Dynamics of Ageing: Evidence from the English Longitudinal Study of Ageing 2002 – 2012 (Wave 6)*.  
17 London: 2014. [http://www.elsa-](http://www.elsa-project.ac.uk/uploads/elsa/docs_w6/ELSA%20Wave%206%20report.pdf)  
18 [project.ac.uk/uploads/elsa/docs\\_w6/ELSA%20Wave%206%20report.pdf](http://www.elsa-project.ac.uk/uploads/elsa/docs_w6/ELSA%20Wave%206%20report.pdf)  
19  
20  
21 62 Davis EM, Clark JM, Carrese JA, *et al.* Racial and Socioeconomic Differences in the Weight-Loss  
22 Experiences of Obese Women. *Am J Public Health* 2005;**95**:1539–43. doi:10.2105/AJPH.2004.047050  
23  
24 63 Pinquart M, Sörensen S. Risk factors for loneliness in adulthood and old age--a meta-analysis. In:  
25 *Advances in psychology research, Vol. 19*. Hauppauge, NY, US: : Nova Science Publishers 2003. 111–43.  
26  
27 64 Levine MP. Loneliness and Eating Disorders. *J Psychol* 2012;**146**:243–57.  
28 doi:10.1080/00223980.2011.606435  
29  
30 65 Hiddink GJ, Hautvast JG, van Woerkum CM, *et al.* Nutrition guidance by primary-care physicians:  
31 perceived barriers and low involvement. *Eur J Clin Nutr* 1995;**49**:842–51.  
32  
33 66 Harris JE, Hamaday V, Mochan E. Osteopathic family physicians' attitudes, knowledge, and self-reported  
34 practices regarding obesity. *J Am Osteopath Assoc* 1999;**99**:358–65.  
35  
36 67 Ruelaz AR, Diefenbach P, Simon B, *et al.* Perceived Barriers to Weight Management in Primary Care--  
37 Perspectives of Patients and Providers. *J Gen Intern Med* 2007;**22**:518–22. doi:10.1007/s11606-007-  
38 0125-4  
39  
40  
41 68 Kenner MM, Taylor ML, Dunn PC, *et al.* Primary Care Providers Need a Variety of Nutrition and Wellness  
42 Patient Education Materials. *J Am Diet Assoc* 1999;**99**:462–6. doi:10.1016/S0002-8223(99)00113-3  
43  
44 69 Leverence RR, Williams RL, Sussman A, *et al.* Obesity counseling and guidelines in primary care: a  
45 qualitative study. *Am J Prev Med* 2007;**32**:334–9. doi:10.1016/j.amepre.2006.12.008  
46  
47 70 Foster GD, Wadden TA, Makris AP, *et al.* Primary care physicians' attitudes about obesity and its  
48 treatment. *Obes Res* 2003;**11**:1168–77. doi:10.1038/oby.2003.161  
49  
50  
51 71 Michie S. Talking to primary care patients about weight: A study of GPs and practice nurses in the UK.  
52 *Psychol Health Med* 2007;**12**:521–5. doi:10.1080/13548500701203441  
53  
54  
55  
56  
57  
58  
59

- 1  
2  
3 72 Robinson E, Parretti H, Aveyard P. Visual identification of obesity by healthcare professionals: an  
4 experimental study of trainee and qualified GPs. *Br J Gen Pract J R Coll Gen Pract* 2014;**64**:e703-708.  
5 doi:10.3399/bjgp14X682285  
6  
7 73 Rose SA, Poynter PS, Anderson JW, *et al*. Physician weight loss advice and patient weight loss behavior  
8 change: a literature review and meta-analysis of survey data. *Int J Obes* 2005 2013;**37**:118–28.  
9 doi:10.1038/ijo.2012.24  
10  
11 74 Puhl RM, Heuer CA. Obesity stigma: important considerations for public health. *Am J Public Health*  
12 2010;**100**:1019–28. doi:10.2105/AJPH.2009.159491  
13  
14  
15  
16  
17  
18  
19  
20  
21  
22  
23  
24  
25  
26  
27  
28  
29  
30  
31  
32  
33  
34  
35  
36  
37  
38  
39  
40  
41  
42  
43  
44  
45  
46  
47  
48  
49  
50  
51  
52  
53  
54  
55  
56  
57  
58  
59  
60

For peer review only

## Tables

**Table 1.** Topic guide for qualitative interviews

| Topics                                                |                                    | Prompts                                                                                                               |
|-------------------------------------------------------|------------------------------------|-----------------------------------------------------------------------------------------------------------------------|
| Introductions and background                          | Introductions                      | Who we are and aim of study<br>Check length of interview (30-60 mins) ok                                              |
| Experiences of weight management                      | Weight history                     | Brief overview of weight across the life course<br>Always struggled with weight?                                      |
|                                                       | Recent attempts at weight loss     | Methods<br>Success                                                                                                    |
|                                                       | Any changes with age               | Methods<br>How easy it is<br>Success/achieving goals<br>Reasons (or perceived reasons) for any changes                |
| Motivation to lose weight                             | Reasons for losing weight          | Appearance reasons<br>Health reasons<br>Doctor's advice<br>Family and friends                                         |
|                                                       | Any changes with age               | Amount of motivation<br>Reasons for losing weight<br>In what way?                                                     |
|                                                       | Personal importance of weight      | Impact on life/health/wellbeing<br>Has it changed with age?                                                           |
| Barriers to losing weight                             | Current barriers                   | Lack of willpower<br>Lack of support<br>Financial issues<br>Health problems<br>Social life                            |
|                                                       | Any changes in barriers with age   |                                                                                                                       |
| Appropriateness of weight management for older people | Own views                          | Something you can/should be doing?                                                                                    |
|                                                       | Perception of other people's views | Something you can/should be doing?<br>Is it something family/friends encourage?<br>Guidance from health professionals |

**Table 2.** Socio-demographic and health characteristics

| Socio-demographic details          | Total sample (n=15)            |
|------------------------------------|--------------------------------|
| Sex, n (%)                         |                                |
| Male                               | 3 (20.0)                       |
| Female                             | 12 (80.0)                      |
| Age (years), mean $\pm$ SD (range) | 71.67 $\pm$ 4.32 (67–84)       |
| Ethnicity, n (%)                   |                                |
| White British                      | 11 (73.3)                      |
| White Irish                        | 1 (6.7)                        |
| White other                        | 3 (20.0)                       |
| BMI, mean $\pm$ SD (range)         | 30.15 $\pm$ 5.43 (23.29–40.38) |
| Weight status, n (%)               |                                |
| Normal weight                      | 2 (13.3)                       |
| Overweight                         | 8 (53.3)                       |
| Obese                              | 5 (33.3)                       |

BMI, body mass index.

## COREQ (CONsolidated criteria for REporting Qualitative research) Checklist

A checklist of items that should be included in reports of qualitative research. You must report the page number in your manuscript where you consider each of the items listed in this checklist. If you have not included this information, either revise your manuscript accordingly before submitting or note N/A.

| Topic                                          | Item No. | Guide Questions/Description                                                                                                                              | Reported on Page No. |
|------------------------------------------------|----------|----------------------------------------------------------------------------------------------------------------------------------------------------------|----------------------|
| <b>Domain 1: Research team and reflexivity</b> |          |                                                                                                                                                          |                      |
| <i>Personal characteristics</i>                |          |                                                                                                                                                          |                      |
| Interviewer/facilitator                        | 1        | Which author/s conducted the interview or focus group?                                                                                                   |                      |
| Credentials                                    | 2        | What were the researcher's credentials? E.g. PhD, MD                                                                                                     |                      |
| Occupation                                     | 3        | What was their occupation at the time of the study?                                                                                                      |                      |
| Gender                                         | 4        | Was the researcher male or female?                                                                                                                       |                      |
| Experience and training                        | 5        | What experience or training did the researcher have?                                                                                                     |                      |
| <i>Relationship with participants</i>          |          |                                                                                                                                                          |                      |
| Relationship established                       | 6        | Was a relationship established prior to study commencement?                                                                                              |                      |
| Participant knowledge of the interviewer       | 7        | What did the participants know about the researcher? e.g. personal goals, reasons for doing the research                                                 |                      |
| Interviewer characteristics                    | 8        | What characteristics were reported about the interviewer/facilitator? e.g. Bias, assumptions, reasons and interests in the research topic                |                      |
| <b>Domain 2: Study design</b>                  |          |                                                                                                                                                          |                      |
| <i>Theoretical framework</i>                   |          |                                                                                                                                                          |                      |
| Methodological orientation and Theory          | 9        | What methodological orientation was stated to underpin the study? e.g. grounded theory, discourse analysis, ethnography, phenomenology, content analysis |                      |
| <i>Participant selection</i>                   |          |                                                                                                                                                          |                      |
| Sampling                                       | 10       | How were participants selected? e.g. purposive, convenience, consecutive, snowball                                                                       |                      |
| Method of approach                             | 11       | How were participants approached? e.g. face-to-face, telephone, mail, email                                                                              |                      |
| Sample size                                    | 12       | How many participants were in the study?                                                                                                                 |                      |
| Non-participation                              | 13       | How many people refused to participate or dropped out? Reasons?                                                                                          |                      |
| <i>Setting</i>                                 |          |                                                                                                                                                          |                      |
| Setting of data collection                     | 14       | Where was the data collected? e.g. home, clinic, workplace                                                                                               |                      |
| Presence of non-participants                   | 15       | Was anyone else present besides the participants and researchers?                                                                                        |                      |
| Description of sample                          | 16       | What are the important characteristics of the sample? e.g. demographic data, date                                                                        |                      |
| <i>Data collection</i>                         |          |                                                                                                                                                          |                      |
| Interview guide                                | 17       | Were questions, prompts, guides provided by the authors? Was it pilot tested?                                                                            |                      |
| Repeat interviews                              | 18       | Were repeat interviews carried out? If yes, how many?                                                                                                    |                      |
| Audio/visual recording                         | 19       | Did the research use audio or visual recording to collect the data?                                                                                      |                      |
| Field notes                                    | 20       | Were field notes made during and/or after the interview or focus group?                                                                                  |                      |
| Duration                                       | 21       | What was the duration of the interviews or focus group?                                                                                                  |                      |
| Data saturation                                | 22       | Was data saturation discussed?                                                                                                                           |                      |
| Transcripts returned                           | 23       | Were transcripts returned to participants for comment and/or                                                                                             |                      |

| Topic                                  | Item No. | Guide Questions/Description                                                                                                        | Reported on Page No. |
|----------------------------------------|----------|------------------------------------------------------------------------------------------------------------------------------------|----------------------|
|                                        |          | correction?                                                                                                                        |                      |
| <b>Domain 3: analysis and findings</b> |          |                                                                                                                                    |                      |
| <i>Data analysis</i>                   |          |                                                                                                                                    |                      |
| Number of data coders                  | 24       | How many data coders coded the data?                                                                                               |                      |
| Description of the coding tree         | 25       | Did authors provide a description of the coding tree?                                                                              |                      |
| Derivation of themes                   | 26       | Were themes identified in advance or derived from the data?                                                                        |                      |
| Software                               | 27       | What software, if applicable, was used to manage the data?                                                                         |                      |
| Participant checking                   | 28       | Did participants provide feedback on the findings?                                                                                 |                      |
| <i>Reporting</i>                       |          |                                                                                                                                    |                      |
| Quotations presented                   | 29       | Were participant quotations presented to illustrate the themes/findings?<br>Was each quotation identified? e.g. participant number |                      |
| Data and findings consistent           | 30       | Was there consistency between the data presented and the findings?                                                                 |                      |
| Clarity of major themes                | 31       | Were major themes clearly presented in the findings?                                                                               |                      |
| Clarity of minor themes                | 32       | Is there a description of diverse cases or discussion of minor themes?                                                             |                      |

Developed from: Tong A, Sainsbury P, Craig J. Consolidated criteria for reporting qualitative research (COREQ): a 32-item checklist for interviews and focus groups. *International Journal for Quality in Health Care*. 2007. Volume 19, Number 6: pp. 349 – 357

**Once you have completed this checklist, please save a copy and upload it as part of your submission. DO NOT include this checklist as part of the main manuscript document. It must be uploaded as a separate file.**
